# Supplementary material for: An intramolecular hydrogen bond-promoted “green” Ugi cascade reaction for the synthesis of 2,5-diketopiperazines with anticancer activity
Source: Royal Society of Chemistry journal article supplement (doi:10.1039/d2ra04958a), 2022-01-01
Supplement: d2ra04958a1.pdf [file d2ra04958a1.pdf]

This version of the ESI published 3 February 2023 replaces the original version published 21 November 2022 as there were some errors in the crystallography data.

# Supporting Information

## An intramolecular hydrogen bond-promoted green Ugi cascade reaction for synthesis of 2,5-diketopiperazines with anticancer activity

Jie Li,<sup>a</sup> Jiu-Hong Huang,<sup>a</sup> Jing-Ya Wang,<sup>a</sup> Zhi-Gang Xu,<sup>a</sup> Zhong-Zhu Chen,<sup>a</sup> Jie Lei<sup>\*a</sup>

<sup>a</sup> College of Pharmacy, National & Local Joint Engineering Research Center of Targeted and Innovative Therapeutics, IATTI, Chongqing University of Arts and Sciences, Chongqing 402160, China.

\*Corresponding author: jlei0916@163.com

| Table of Contents                                        | Page  |
|----------------------------------------------------------|-------|
| General Experimental.....                                | 2     |
| General procedures for compound ( $\pm$ ) <b>5</b> ..... | 2     |
| X-ray structure and data of ( $\pm$ ) <b>5a</b> .....    | 3     |
| Cell lines and culture and MTT assay.....                | 10-12 |
| NMR Characterization Data and Figures of Products.....   | 13-39 |

## General Experimental

<sup>1</sup>H and <sup>13</sup>C NMR were recorded on a Bruker 400 spectrometer (Switzerland NMR Nuclear Magnetic Resonance Spectrometer, AVANCE II 400). <sup>1</sup>H NMR data are reported as follows: chemical shift in ppm ( $\delta$ ), multiplicity (s = singlet, d = doublet, t = triplet, m = multiplet), coupling constant (Hz), relative intensity. <sup>13</sup>C NMR data are reported as follows: chemical shift in ppm ( $\delta$ ). LC/MS analyses were performed on a Shimadzu-2020 LC-MS instrument (Japanese, Shimadzu, N2G 40-A200.6) using the following conditions: Shim-pack VP-ODS C18 column (reverse phase, 150  $\times$  4.6 mm); a linear gradient from 10% water and 90% acetonitrile to 75% acetonitrile and 25% water over 6.0 min; flow rate of 0.5 mL/min; UV photodiode array detection from 200 to 400 nm. High-resolution mass spectra (HRMS) (Thermo Scientific Q Exactive; Shimadzu 7250, Japanese) were recorded on Thermo Scientific Exactive Plus System. The products were purified by Biotage Isolera<sup>TM</sup> Spektra Systems and hexane/EtOAc solvent systems. All reagents and solvents were obtained from commercial sources and used without further purification.

## General procedures for compounds ( $\pm$ ) 5

A mixture of acid (0.3 mmol), isocyanide (0.3 mmol), amine (0.3 mmol) and aldehyde (0.3 mmol) was stirred overnight in methanol (2.0 mL). The reaction mixture was monitored by TLC. When the reaction was completed, the solvent was removed under reduced pressure. The crude compound was directly treated with DIPA (2.0 equiv.) at MW 160  $^{\circ}$ C, 20 min. Then the reaction mixture was diluted with EtOAc (15.0 mL), washed with sat. Na<sub>2</sub>CO<sub>3</sub> and brine. The organic layer was dried over MgSO<sub>4</sub> and concentrated. The residue was purified by silica gel column chromatography using a gradient of ethyl acetate/hexane (0-100%) to afford the relative targeted product.

## X-ray structure and data of ( $\pm$ )5a

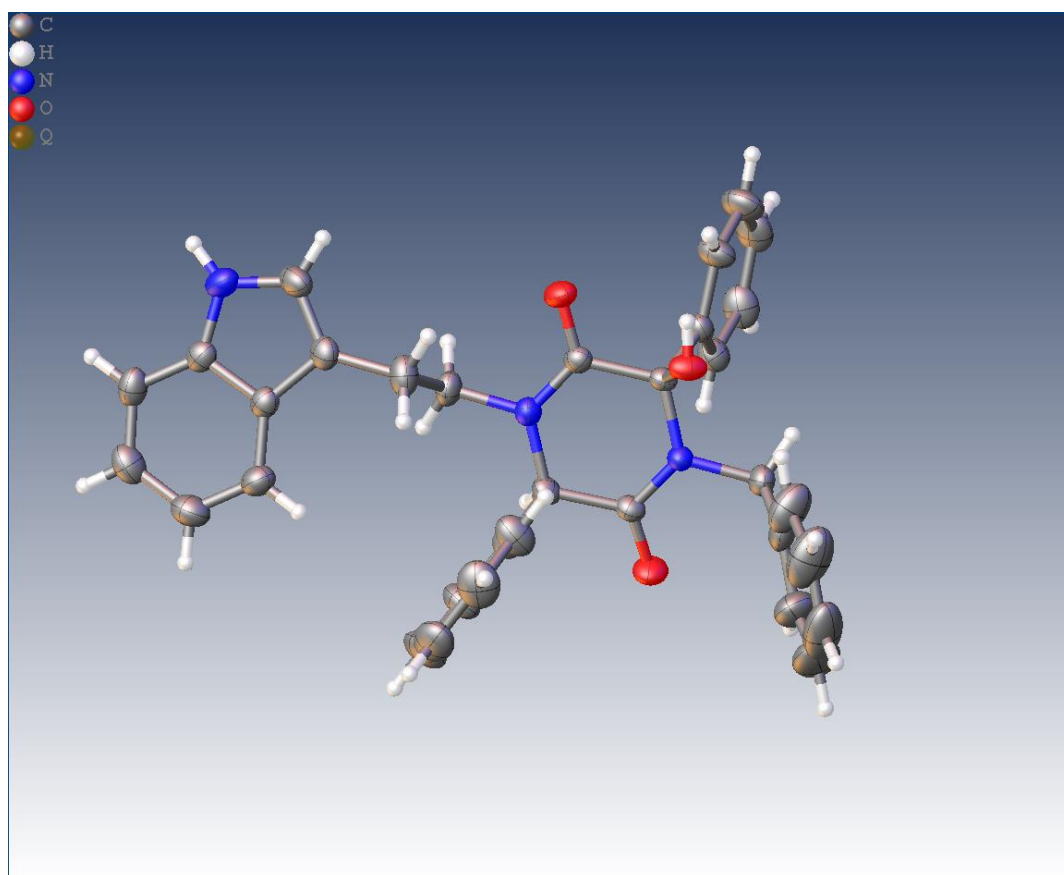

**Table 1 Crystal data and structure refinement for ( $\pm$ ) 5a.**

|                     |                                                               |
|---------------------|---------------------------------------------------------------|
| Identification code | ( $\pm$ ) <b>5a</b>                                           |
| Empirical formula   | C <sub>33</sub> H <sub>29</sub> N <sub>3</sub> O <sub>3</sub> |
| Formula weight      | 515.59                                                        |
| Temperature/K       | 296(2)                                                        |
| Crystal system      | triclinic                                                     |
| Space group         | P-1                                                           |
| a/Å                 | 7.1229(8)                                                     |

|                                             |                                                               |
|---------------------------------------------|---------------------------------------------------------------|
| b/Å                                         | 12.8851(13)                                                   |
| c/Å                                         | 15.0472(15)                                                   |
| $\alpha$ /°                                 | 92.354(2)                                                     |
| $\beta$ /°                                  | 103.338(2)                                                    |
| $\gamma$ /°                                 | 91.502(2)                                                     |
| Volume/Å <sup>3</sup>                       | 1341.7(2)                                                     |
| Z                                           | 2                                                             |
| $\rho_{\text{calc}}$ /g/cm <sup>3</sup>     | 1.276                                                         |
| $\mu$ /mm <sup>-1</sup>                     | 0.083                                                         |
| F(000)                                      | 544.0                                                         |
| Crystal size/mm <sup>3</sup>                | 0.3 × 0.28 × 0.27                                             |
| Radiation                                   | MoK $\alpha$ ( $\lambda$ = 0.71073)                           |
| 2 $\Theta$ range for data collection/°      | 6.274 to 50                                                   |
| Index ranges                                | -8 ≤ h ≤ 6, -13 ≤ k ≤ 15, -17 ≤ l ≤ 17                        |
| Reflections collected                       | 6862                                                          |
| Independent reflections                     | 4688 [R <sub>int</sub> = 0.0180, R <sub>sigma</sub> = 0.0257] |
| Data/restraints/parameters                  | 4688/0/354                                                    |
| Goodness-of-fit on F <sup>2</sup>           | 0.964                                                         |
| Final R indexes [I >= 2 $\sigma$ (I)]       | R <sub>1</sub> = 0.0364, wR <sub>2</sub> = 0.1009             |
| Final R indexes [all data]                  | R <sub>1</sub> = 0.0466, wR <sub>2</sub> = 0.1074             |
| Largest diff. peak/hole / e Å <sup>-3</sup> | 0.19/-0.17                                                    |

**Table 2 Fractional Atomic Coordinates ( $\times 10^4$ ) and Equivalent Isotropic Displacement Parameters ( $\text{\AA}^2 \times 10^3$ ) for ( $\pm$ ) 5a.  $U_{\text{eq}}$  is defined as 1/3 of the trace of the orthogonalised  $U_{\text{IJ}}$  tensor.**

| Atom | x           | y          | z          | $U_{\text{eq}}$ |
|------|-------------|------------|------------|-----------------|
| O1   | 10557.7(14) | 3169.0(7)  | 1928.9(7)  | 42.0(3)         |
| O2   | 11249.5(12) | 2290.6(8)  | 3661.1(6)  | 36.0(2)         |
| O3   | 5012.6(13)  | 2169.4(8)  | 3626.4(7)  | 43.0(3)         |
| N1   | 8153.5(19)  | 6911.9(9)  | -253.3(8)  | 43.1(3)         |
| N2   | 7665.0(16)  | 3530.7(8)  | 2211.8(7)  | 31.2(3)         |
| N3   | 8041.0(14)  | 1937.6(8)  | 3472.9(7)  | 27.6(2)         |
| C1   | 5113(2)     | 7907.1(11) | -378.1(9)  | 41.3(4)         |
| C2   | 3618(2)     | 8065.6(12) | 41.0(11)   | 47.0(4)         |
| C3   | 3525(2)     | 7572.5(12) | 841.6(11)  | 48.8(4)         |
| C4   | 4913(2)     | 6895.0(11) | 1230.8(10) | 41.2(3)         |
| C5   | 6443.6(19)  | 6704.5(10) | 812.6(9)   | 32.0(3)         |
| C6   | 6524(2)     | 7221.0(10) | 9.6(9)     | 33.0(3)         |
| C7   | 9074(2)     | 6220.1(11) | 352.8(11)  | 42.9(4)         |
| C8   | 8100(2)     | 6067.7(10) | 1020.2(9)  | 36.0(3)         |
| C9   | 8562(2)     | 5329.9(11) | 1779.5(10) | 44.1(4)         |
| C10  | 7342(2)     | 4321.8(10) | 1512.5(9)  | 36.9(3)         |
| C11  | 6147.2(18)  | 3375.6(10) | 2711.5(9)  | 30.0(3)         |
| C12  | 6377.7(17)  | 2436.0(10) | 3298.8(8)  | 28.9(3)         |

|     |            |            |            |         |
|-----|------------|------------|------------|---------|
| C13 | 9563.0(17) | 2075.3(9)  | 2977.6(8)  | 26.2(3) |
| C14 | 9262.9(18) | 2987.7(10) | 2330.0(8)  | 29.0(3) |
| C15 | 5941.9(19) | 4342.6(10) | 3294.3(9)  | 33.8(3) |
| C16 | 7512(2)    | 4778.2(13) | 3930.6(11) | 51.6(4) |
| C17 | 7309(3)    | 5659.3(14) | 4458.0(12) | 64.3(5) |
| C18 | 5551(3)    | 6105.4(14) | 4350.4(13) | 65.1(5) |
| C19 | 3999(3)    | 5683.2(14) | 3723.8(15) | 65.8(5) |
| C20 | 4180(2)    | 4798.8(12) | 3191.1(12) | 49.7(4) |
| C21 | 8224(2)    | 1054.3(10) | 4093.9(9)  | 35.0(3) |
| C22 | 8565(2)    | 1388.5(11) | 5095.6(10) | 43.2(4) |
| C23 | 10352(3)   | 1762.0(15) | 5579.9(12) | 68.4(5) |
| C24 | 10677(4)   | 2050.9(18) | 6506.8(14) | 92.5(8) |
| C25 | 9255(6)    | 1963.5(18) | 6950.8(15) | 95.3(9) |
| C26 | 7470(5)    | 1586(2)    | 6493.6(17) | 97.4(9) |
| C27 | 7108(3)    | 1297.5(17) | 5558.3(13) | 72.9(6) |
| C28 | 9630.1(18) | 1102.4(9)  | 2357.6(8)  | 29.4(3) |
| C29 | 11305(2)   | 869.5(12)  | 2080.3(11) | 43.8(4) |
| C30 | 11293(3)   | 59.1(13)   | 1438.2(12) | 55.1(4) |
| C31 | 9640(3)    | -531.7(12) | 1085.5(11) | 52.9(4) |
| C32 | 7979(2)    | -325.4(12) | 1372.6(10) | 48.6(4) |
| C33 | 7969(2)    | 494.5(11)  | 2000.9(9)  | 38.0(3) |

**Table 3 Anisotropic Displacement Parameters ( $\text{\AA}^2 \times 10^3$ ) for ( $\pm$ ) 5a. The Anisotropic displacement factor exponent takes the form:  $-2 \pi^2 [h^2 a^{*2} U_{11} + 2 h k a^* b^* U_{12} + \dots]$ .**

| Atom | U11     | U22     | U33      | U23     | U13     | U12     |
|------|---------|---------|----------|---------|---------|---------|
| O1   | 46.5(6) | 38.6(5) | 50.4(6)  | 7.4(4)  | 29.6(5) | 4.1(5)  |
| O2   | 23.3(5) | 53.0(6) | 31.8(5)  | -4.4(4) | 8.0(4)  | 0.1(4)  |
| O3   | 26.2(5) | 52.0(6) | 55.6(6)  | 11.9(5) | 17.6(5) | 3.9(4)  |
| N1   | 56.2(8) | 37.9(7) | 43.1(7)  | 4.4(5)  | 27.0(6) | 2.3(6)  |
| N2   | 34.3(6) | 29.4(6) | 31.4(6)  | 4.5(4)  | 10.1(5) | 5.1(5)  |
| N3   | 25.0(5) | 28.7(5) | 31.5(6)  | 5.4(4)  | 10.2(4) | 4.8(4)  |
| C1   | 55.6(9) | 32.8(7) | 31.6(7)  | 3.3(6)  | 2.4(7)  | 0.4(7)  |
| C2   | 43.0(9) | 42.9(8) | 50.8(9)  | -0.6(7) | 1.8(7)  | 8.9(7)  |
| C3   | 41.8(9) | 50.2(9) | 57.9(10) | -2.4(7) | 19.0(7) | 6.2(7)  |
| C4   | 46.4(9) | 41.4(8) | 39.9(8)  | 3.2(6)  | 18.4(7) | 0.3(7)  |
| C5   | 38.0(7) | 26.6(6) | 31.5(7)  | -0.5(5) | 8.9(6)  | -1.6(6) |
| C6   | 41.3(8) | 27.3(6) | 30.9(7)  | -2.3(5) | 10.6(6) | -2.9(6) |
| C7   | 43.6(8) | 31.2(7) | 58.4(9)  | 0.2(6)  | 21.3(7) | 6.2(6)  |
| C8   | 40.5(8) | 25.6(7) | 42.0(8)  | 1.4(6)  | 9.6(6)  | 0.5(6)  |
| C9   | 48.9(9) | 33.1(7) | 46.3(8)  | 5.9(6)  | 2.1(7)  | 2.8(7)  |
| C10  | 44.6(8) | 32.7(7) | 33.0(7)  | 7.5(6)  | 6.8(6)  | 4.7(6)  |
| C11  | 23.8(6) | 33.3(7) | 32.2(7)  | 1.8(5)  | 4.5(5)  | 5.1(5)  |
| C12  | 23.4(6) | 31.6(7) | 31.8(6)  | -1.6(5) | 6.8(5)  | 1.6(5)  |
| C13  | 21.7(6) | 29.9(6) | 27.6(6)  | 0.1(5)  | 7.2(5)  | 2.8(5)  |

|     |          |          |          |          |          |           |
|-----|----------|----------|----------|----------|----------|-----------|
| C14 | 31.7(7)  | 27.4(6)  | 29.5(6)  | -2.3(5)  | 11.2(5)  | 0.3(5)    |
| C15 | 35.8(7)  | 32.3(7)  | 35.2(7)  | 3.0(5)   | 11.5(6)  | 6.7(6)    |
| C16 | 48.8(9)  | 52.4(9)  | 47.6(9)  | -8.0(7)  | 0.0(7)   | 10.4(8)   |
| C17 | 83.7(14) | 54.7(10) | 47.5(10) | -13.7(8) | 3.6(9)   | 1.1(10)   |
| C18 | 99.3(16) | 40.8(9)  | 63.4(11) | -8.2(8)  | 36.5(11) | 10.0(10)  |
| C19 | 64.5(12) | 48.8(10) | 92.9(14) | -3.6(10) | 35.5(11) | 21.7(9)   |
| C20 | 39.8(8)  | 42.6(8)  | 68.4(11) | -0.7(7)  | 15.6(8)  | 10.2(7)   |
| C21 | 37.8(7)  | 29.3(7)  | 40.4(8)  | 8.1(6)   | 12.9(6)  | 4.0(6)    |
| C22 | 61.7(10) | 33.3(7)  | 39.0(8)  | 13.0(6)  | 17.7(7)  | 11.4(7)   |
| C23 | 86.7(14) | 72.0(12) | 41.8(9)  | 9.4(8)   | 5.9(9)   | -15.0(11) |
| C24 | 139(2)   | 82.6(15) | 45.9(11) | 5.9(10)  | 3.4(13)  | -18.5(15) |
| C25 | 175(3)   | 69.4(14) | 44.1(11) | 11.7(10) | 26.8(16) | 25.1(17)  |
| C26 | 141(3)   | 110(2)   | 63.8(14) | 25.3(14) | 63.5(17) | 42.5(19)  |
| C27 | 85.7(14) | 88.3(14) | 58.0(11) | 22.3(10) | 38.5(11) | 21.5(12)  |
| C28 | 33.3(7)  | 27.2(6)  | 28.2(6)  | 3.3(5)   | 6.9(5)   | 7.1(5)    |
| C29 | 40.8(8)  | 40.6(8)  | 53.3(9)  | -7.8(7)  | 18.8(7)  | 4.8(6)    |
| C30 | 62.0(11) | 49.4(9)  | 60.8(10) | -11.1(8) | 29.8(9)  | 11.3(8)   |
| C31 | 76.4(12) | 37.8(8)  | 43.4(9)  | -10.8(7) | 12.9(8)  | 10.4(8)   |
| C32 | 57.4(10) | 38.6(8)  | 42.6(8)  | -7.2(6)  | -1.4(7)  | 0.0(7)    |
| C33 | 36.5(8)  | 37.3(7)  | 37.6(7)  | -0.7(6)  | 3.6(6)   | 4.5(6)    |



**Table 4 Bond Lengths for ( $\pm$ ) 5a.**

| <b>Atom</b> | <b>Atom</b> | <b>Length/Å</b> | <b>Atom</b> | <b>Atom</b> | <b>Length/Å</b> |
|-------------|-------------|-----------------|-------------|-------------|-----------------|
| O1          | C14         | 1.2356 (15)     | C11         | C15         | 1.5237 (18)     |
| O2          | C13         | 1.4024 (15)     | C13         | C14         | 1.5455 (17)     |
| O3          | C12         | 1.2345 (15)     | C13         | C28         | 1.5401 (17)     |
| N1          | C6          | 1.3732 (18)     | C15         | C16         | 1.383 (2)       |
| N1          | C7          | 1.370 (2)       | C15         | C20         | 1.379 (2)       |
| N2          | C10         | 1.4792 (16)     | C16         | C17         | 1.388 (2)       |
| N2          | C11         | 1.4663 (16)     | C17         | C18         | 1.370 (3)       |
| N2          | C14         | 1.3323 (17)     | C18         | C19         | 1.361 (3)       |
| N3          | C12         | 1.3398 (16)     | C19         | C20         | 1.392 (2)       |
| N3          | C13         | 1.4614 (15)     | C21         | C22         | 1.513 (2)       |
| N3          | C21         | 1.4915 (16)     | C22         | C23         | 1.377 (3)       |
| C1          | C2          | 1.373 (2)       | C22         | C27         | 1.381 (2)       |
| C1          | C6          | 1.397 (2)       | C23         | C24         | 1.393 (3)       |
| C2          | C3          | 1.399 (2)       | C24         | C25         | 1.341 (4)       |
| C3          | C4          | 1.379 (2)       | C25         | C26         | 1.365 (4)       |
| C4          | C5          | 1.4011 (19)     | C26         | C27         | 1.404 (3)       |
| C5          | C6          | 1.4149 (18)     | C28         | C29         | 1.3879 (19)     |
| C5          | C8          | 1.4368 (19)     | C28         | C33         | 1.3874 (19)     |
| C7          | C8          | 1.364 (2)       | C29         | C30         | 1.392 (2)       |
| C8          | C9          | 1.4998 (19)     | C30         | C31         | 1.371 (2)       |
| C9          | C10         | 1.530 (2)       | C31         | C32         | 1.378 (2)       |
| C11         | C12         | 1.5182 (17)     | C32         | C33         | 1.390 (2)       |

**Table 5 Bond Angles for ( $\pm$ ) 5a.**

| <b>Atom</b> | <b>Atom</b> | <b>Atom</b> | <b>Angle/<math>^{\circ}</math></b> | <b>Atom</b> | <b>Atom</b> | <b>Atom</b> | <b>Angle/<math>^{\circ}</math></b> |
|-------------|-------------|-------------|------------------------------------|-------------|-------------|-------------|------------------------------------|
| C7          | N1          | C6          | 108.77 (11)                        | N3          | C13         | C14         | 114.05 (10)                        |
| C11         | N2          | C10         | 116.89 (10)                        | N3          | C13         | C28         | 110.01 (10)                        |
| C14         | N2          | C10         | 118.78 (11)                        | C28         | C13         | C14         | 105.19 (9)                         |
| C14         | N2          | C11         | 124.30 (10)                        | O1          | C14         | N2          | 122.75 (12)                        |
| C12         | N3          | C13         | 124.34 (10)                        | O1          | C14         | C13         | 116.58 (11)                        |
| C12         | N3          | C21         | 118.10 (10)                        | N2          | C14         | C13         | 120.66 (10)                        |
| C13         | N3          | C21         | 116.67 (10)                        | C16         | C15         | C11         | 120.77 (12)                        |
| C2          | C1          | C6          | 117.93 (13)                        | C20         | C15         | C11         | 120.25 (13)                        |
| C1          | C2          | C3          | 121.21 (14)                        | C20         | C15         | C16         | 118.97 (14)                        |
| C4          | C3          | C2          | 121.29 (14)                        | C15         | C16         | C17         | 120.30 (16)                        |
| C3          | C4          | C5          | 118.92 (13)                        | C18         | C17         | C16         | 120.22 (17)                        |
| C4          | C5          | C6          | 118.89 (13)                        | C19         | C18         | C17         | 119.85 (16)                        |
| C4          | C5          | C8          | 133.94 (13)                        | C18         | C19         | C20         | 120.57 (17)                        |
| C6          | C5          | C8          | 107.17 (12)                        | C15         | C20         | C19         | 120.08 (16)                        |
| N1          | C6          | C1          | 130.91 (13)                        | N3          | C21         | C22         | 113.85 (11)                        |
| N1          | C6          | C5          | 107.35 (12)                        | C23         | C22         | C21         | 120.95 (15)                        |
| C1          | C6          | C5          | 121.73 (13)                        | C23         | C22         | C27         | 118.03 (17)                        |
| C8          | C7          | N1          | 110.72 (13)                        | C27         | C22         | C21         | 120.99 (16)                        |
| C5          | C8          | C9          | 126.36 (13)                        | C22         | C23         | C24         | 121.0 (2)                          |
| C7          | C8          | C5          | 105.99 (12)                        | C25         | C24         | C23         | 120.7 (2)                          |
| C7          | C8          | C9          | 127.51 (14)                        | C24         | C25         | C26         | 119.9 (2)                          |
| C8          | C9          | C10         | 109.99 (12)                        | C25         | C26         | C27         | 120.4 (2)                          |
| N2          | C10         | C9          | 115.03 (11)                        | C22         | C27         | C26         | 120.1 (2)                          |
| N2          | C11         | C12         | 114.75 (10)                        | C29         | C28         | C13         | 120.68 (12)                        |
| N2          | C11         | C15         | 111.41 (10)                        | C29         | C28         | C33         | 118.66 (12)                        |
| C12         | C11         | C15         | 109.51 (10)                        | C33         | C28         | C13         | 120.42 (11)                        |
| O3          | C12         | N3          | 121.62 (12)                        | C28         | C29         | C30         | 120.28 (15)                        |
| O3          | C12         | C11         | 117.97 (11)                        | C31         | C30         | C29         | 120.53 (15)                        |
| N3          | C12         | C11         | 120.38 (11)                        | C30         | C31         | C32         | 119.76 (14)                        |
| O2          | C13         | N3          | 104.75 (9)                         | C31         | C32         | C33         | 120.08 (15)                        |
| O2          | C13         | C14         | 108.46 (10)                        | C28         | C33         | C32         | 120.65 (14)                        |
| O2          | C13         | C28         | 114.62 (10)                        |             |             |             |                                    |

**Table 6 Hydrogen Atom Coordinates ( $\text{\AA}\times 10^4$ ) and Isotropic Displacement Parameters ( $\text{\AA}^2\times 10^3$ ) for ( $\pm$ ) 5a.**

| Atom | x     | y     | z    | U(eq) |
|------|-------|-------|------|-------|
| H2   | 12189 | 2281  | 3433 | 54    |
| H1   | 8534  | 7118  | -721 | 52    |
| H1A  | 5184  | 8246  | -904 | 50    |
| H2A  | 2649  | 8509  | -212 | 56    |
| H3   | 2507  | 7704  | 1117 | 59    |
| H4   | 4834  | 6570  | 1762 | 49    |
| H7   | 10208 | 5898  | 314  | 51    |
| H9A  | 8298  | 5648  | 2332 | 53    |
| H9B  | 9921  | 5178  | 1903 | 53    |
| H10A | 5989  | 4490  | 1379 | 44    |
| H10B | 7610  | 4021  | 955  | 44    |
| H11  | 4927  | 3265  | 2253 | 36    |
| H16  | 8710  | 4480  | 4006 | 62    |
| H17  | 8370  | 5948  | 4886 | 77    |
| H18  | 5418  | 6695  | 4705 | 78    |
| H19  | 2807  | 5988  | 3651 | 79    |
| H20  | 3111  | 4515  | 2765 | 60    |
| H21A | 9286  | 637   | 4006 | 42    |
| H21B | 7053  | 619   | 3924 | 42    |
| H23  | 11358 | 1822  | 5284 | 82    |
| H24  | 11893 | 2307  | 6821 | 111   |
| H25  | 9485  | 2160  | 7569 | 114   |
| H26  | 6488  | 1520  | 6804 | 117   |
| H27  | 5887  | 1045  | 5250 | 87    |
| H29  | 12441 | 1257  | 2325 | 53    |
| H30  | 12415 | -83   | 1247 | 66    |
| H31  | 9640  | -1070 | 654  | 63    |
| H32  | 6864  | -735  | 1146 | 58    |
| H33  | 6838  | 637   | 2184 | 46    |

### Cell lines and culture

The human prostate tumor cells PC3 and DU145, acute lymphoblastic leukemia cells Jurkat, biphenotypic B-myelomonocytic leukemia cells MV-4-11 were obtained from American Type Culture Collection (ATCC, Manassas, VA, USA). The DU145 cells were cultured in high-glucose DMEM (Hyclone, SH30022.01, USA) medium supplemented with 10% fetal bovine serum (FBS, Gibco, 10099, Australia origin). The PC3 cells were cultured with the Ham's F-12K (Kaighn's) Medium (GIBCO, 21127022, USA) supplemented with 10% FBS. The Jurkat and MV-4-11 cells were

cultured with RPMI 1640 medium (GIBCO, 11875093, USA) supplemented with 10% fetal bovine serum (FBS, Gibco, 10099, Australia). The cells were cultured in the incubator at the 37 °C and 5% CO<sub>2</sub> with humidified atmosphere.

### **Cell viability assay**

The tumor cells were counted and seeded into the 96-well plate containing 100 µL complete medium, the density of cells were  $3 \times 10^3$  cells per well for PC3 and DU145. After incubation for 24 hours, added another 100 µL complete medium containing 10 µM compounds ( $\pm$ ) **5** or equal amount of Dimethyl sulfoxide (DMSO), each treatment was triple replicated. The compound-treated cells were cultured for another 48 hours, 3-(4, 5-dimethyl-2-thiazolyl)-2, 5-diphenyl-2-*H*-tetrazolium bromide (MTT, Beyotime, ST316, Shanghai, China) was added, the plate was incubated for another 4 hours. After incubation, removed the medium and added 150 µL DMSO into each well to dissolve the formazan. The optical density (OD) of each well was measured with a microplate reader (Bio-Tek, Winooski, VT, USA) at an absorbance wavelength of 570 nm. Similar to PC3 cells, Jurkat cells and MV-4-11 cells were seeded into the 96-well plate with a density of  $6 \times 10^3$  cells per well, compound-treated cells were cultured for 72 hours and followed by Cell Counting Kit-8 (CCK-8, Beyotime, C0037, Shanghai, China) treatment for another 4 hours. The OD was measured at an absorbance wavelength of 450 nm. The viability of compounds **5** treated cells equal to the ration of OD<sub>compound</sub> to OD<sub>DMSO</sub>. To further evaluate the half maximal inhibitory concentration (IC<sub>50</sub>) of compound ( $\pm$ ) **5c**, MV-4-11 and Jurkat cells were incubated with various concentrations (0, 0.625, 1.25, 2.5, 5, 10 µM) of compound ( $\pm$ ) **5c** for 72 h. The OD of compound-treated cells was measured with CCK-8. The IC<sub>50</sub> values were analyzed by GraphPad Prism 8.

**Transform of ( $\pm$ ) 5c inhibits MV411 IC<sub>50</sub>**

**Transform of ( $\pm$ ) 5e IC<sub>50</sub> in Jurkat**

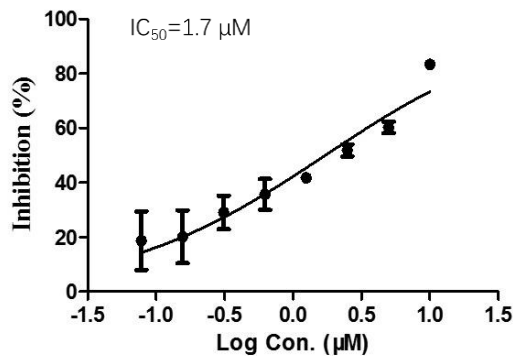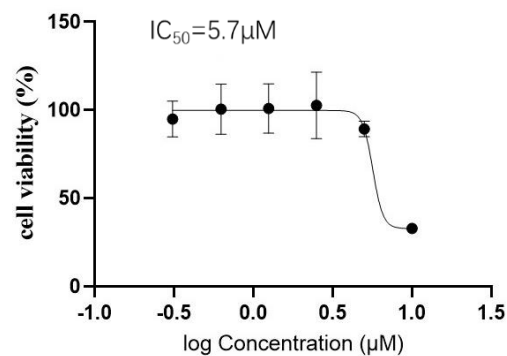

### Flow cytometry analysis

Leukemia cells MV4-11 in the logarithmic growth condition were harvested and seeded into 6-well plates at concentration of 500 thousand per well. The cells were treated with different concentrations of compound ( $\pm$ ) **5 e** or the same amount of DMSO for 48 hours. All cells were collected and analyzed using flow cytometry analysis. For cell cycle analysis, cell were fixed with 70% ethanol at 4 °C for 24 hours, and then washed with PBS for 3 times. Subsequently, cells were stained with PI (50mg/ml, BD Biosciences) and RNase (100mg/ml, Sigma-Aldrich) at 37°C for 30 minutes. The stained cells were analyzed with flow cytometry (Accuri C6, BD biosciences) and the results were recorded. For apoptosis analysis, cells were collected and stained with an Annexin V-FITC/PI apoptosis assay kit following the manufacture’s manual (BD Biosciences). The stained cells were detected with flow cytometry (Accuri C6, BD biosciences). All flow cytometry analysis results were visualized using FlowJo 7.6. The statistical chart of each treatment represents mean $\pm$ SD of 3 (n=3).

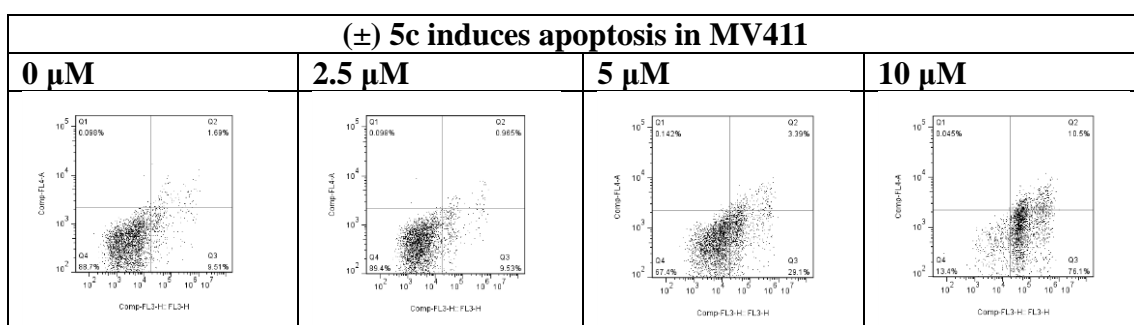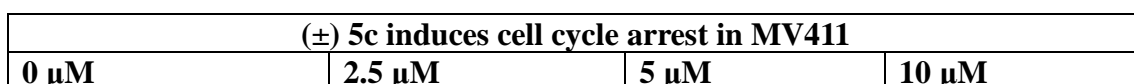

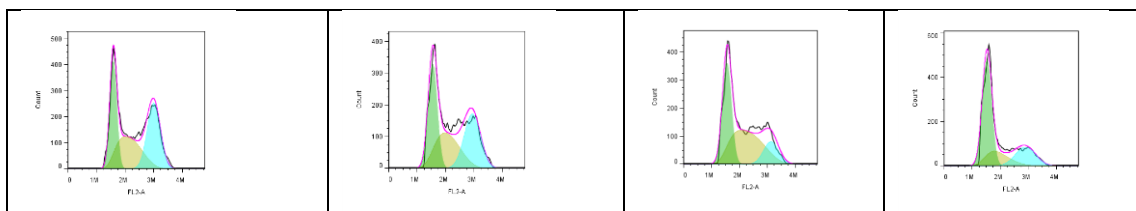

## NMR Characterization Data and Figures of Products

*1-(2-(1H-indol-3-yl)ethyl)-4-benzyl-3-hydroxy-3,6-diphenylpiperazine-2,5-dione*

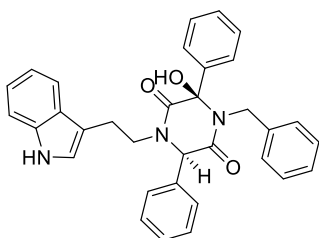

(±) **5a**, brown oil, yield 71%, (EA/Hex = 30%,  $R_f$  = 0.3), purity 97%.  $^1\text{H}$  NMR (400 MHz,  $\text{CDCl}_3$ )  $\delta$  7.65 (s, 1H), 7.53 (d,  $J$  = 7.2 Hz, 2H), 7.47 (d,  $J$  = 7.9 Hz, 1H), 7.39 – 7.28 (m, 4H), 7.24 – 7.20 (m, 1H), 7.18 – 7.09 (m, 6H), 7.06-7.00 (m, 3H), 6.82 (d,  $J$  = 7.7 Hz, 2H), 6.77 (s, 1H), 5.48 (s, 1H), 4.93 (d,  $J$  = 14.1 Hz, 1H), 4.85 (s, 1H), 4.25 (d,  $J$  = 14.1 Hz, 1H), 4.22-4.15 (m, 1H), 3.22 – 3.14 (m, 1H), 3.06 – 3.00 (m, 1H), 2.96 – 2.89 (m, 1H).  $^{13}\text{C}$  NMR (101 MHz,  $\text{CDCl}_3$ )  $\delta$  167.95, 165.27, 139.35, 137.93, 136.24, 133.01, 129.36, 129.00, 128.39, 128.17, 127.27, 126.69, 126.28, 122.37, 119.63, 118.32, 111.39, 85.33, 64.85, 47.59, 22.64. HRMS (ESI)  $m/z$  calcd for  $\text{C}_{33}\text{H}_{30}\text{N}_3\text{O}_3^+$  ( $\text{M}+\text{H}$ ) $^+$  516.2287, found 516.2279.

*1-(2-(1H-indol-3-yl)ethyl)-4-benzyl-6-(4-fluorophenyl)-3-hydroxy-3-phenylpiperazine-2,5-dione*

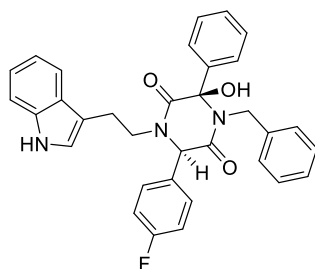

(±) **5b**, brown oil, yield 67% (EA/Hex = 30%,  $R_f$  = 0.3), purity 95%.  $^1\text{H}$  NMR (400 MHz,  $\text{CDCl}_3$ )  $\delta$  7.62 (s, 1H), 7.53 (d,  $J$  = 7.2 Hz, 2H), 7.47 (d,  $J$  = 7.9 Hz, 1H), 7.42 – 7.32 (m, 3H), 7.29 (d,  $J$  = 8.3 Hz, 1H), 7.25 (s, 1H), 7.18-7.13 (m, 3H), 7.08 (d,  $J$  = 7.6 Hz, 2H), 7.02 (t,  $J$  = 7.5 Hz, 1H), 6.82 – 6.66 (m, 5H), 5.50 (s, 1H), 4.93 (d,  $J$  = 14.1 Hz, 1H), 4.77 (s, 1H), 4.28 (d,  $J$  = 14.1 Hz, 1H), 4.21-4.14 (m, 1H), 3.22 – 3.14 (m, 1H), 3.06 – 3.00 (m, 1H), 2.95 – 2.87 (m, 1H).  $^{13}\text{C}$  NMR (101 MHz,  $\text{CDCl}_3$ )  $\delta$  167.94, 165.17, 139.38, 137.83, 136.25, 129.39, 128.49, 128.20, 127.34, 126.80,

126.18, 122.41, 119.68, 118.25, 115.24, 111.45, 85.22, 64.31, 47.56, 47.35, 22.66.  
HRMS (ESI) m/z calcd for C<sub>33</sub>H<sub>29</sub>FN<sub>3</sub>O<sub>3</sub><sup>+</sup> (M+H)<sup>+</sup> 534.2193, found 534.2199.

*1-(2-(1H-indol-3-yl)ethyl)-4-benzyl-6-(4-chlorophenyl)-3-hydroxy-3-phenylpiperazine-2,5-dione*

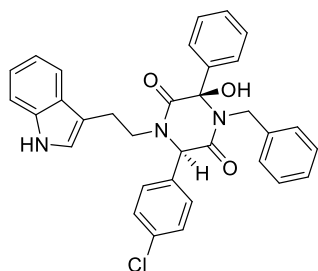

(±) **5c**, brown oil, yield 69%, (EA/Hex = 30%, R<sub>f</sub> = 0.3), purity 97%. <sup>1</sup>H NMR (400 MHz, CDCl<sub>3</sub>) δ 7.62 (s, 1H), 7.52 (d, *J* = 7.3 Hz, 2H), 7.46 (d, *J* = 7.9 Hz, 1H), 7.41 – 7.32 (m, 3H), 7.29 (d, *J* = 8.4 Hz, 1H), 7.24 (s, 1H), 7.18-7.13 (m, 3H), 7.07 (d, *J* = 7.6 Hz, 2H), 7.04-6.98 (m, 3H), 6.75-6.69 (m, 3H), 5.50 (s, 1H), 4.92 (d, *J* = 14.1 Hz, 1H), 4.74 (s, 1H), 4.28 (d, *J* = 14.1 Hz, 1H), 4.21 – 4.12 (m, 1H), 3.23 – 3.13 (m, 1H), 3.07 – 2.98 (m, 1H), 2.95 – 2.85 (m, 1H). <sup>13</sup>C NMR (101 MHz, CDCl<sub>3</sub>) δ 167.94, 164.92, 139.33, 137.79, 136.25, 134.19, 131.55, 129.39, 128.52, 127.98, 127.36, 126.77, 126.15, 122.43, 119.70, 118.23, 111.46, 85.22, 64.40, 47.56, 47.37, 22.66. HRMS (ESI) m/z calcd for C<sub>33</sub>H<sub>29</sub>ClN<sub>3</sub>O<sub>3</sub><sup>+</sup> (M+H)<sup>+</sup> 550.1897, found 550.1889.

*1-(2-(1H-indol-3-yl)ethyl)-4-benzyl-6-(4-bromophenyl)-3-hydroxy-3-phenylpiperazine-2,5-dione*

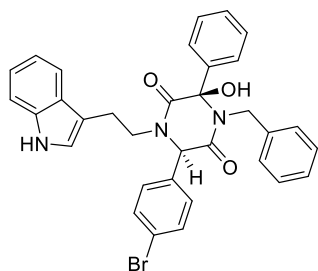

(±) **5d**, brown oil, yield 70%, (EA/Hex = 30%, R<sub>f</sub> = 0.3), purity 97%. <sup>1</sup>H NMR (400 MHz, CDCl<sub>3</sub>) δ 7.62 (s, 1H), 7.52 (d, *J* = 7.1 Hz, 2H), 7.46 (d, *J* = 7.9 Hz, 1H), 7.41 –



7.32 (m, 3H), 7.29 (d,  $J = 8.3$  Hz, 1H), 7.25 (d,  $J = 3.5$  Hz, 1H), 7.21 – 7.11 (m, 5H), 7.10 – 6.98 (m, 3H), 6.74 (d,  $J = 1.8$  Hz, 1H), 6.64 (d,  $J = 8.4$  Hz, 2H), 5.50 (s, 1H), 4.92 (d,  $J = 14.0$  Hz, 1H), 4.71 (s, 1H), 4.28 (d,  $J = 14.1$  Hz, 1H), 4.23 – 4.12 (m, 1H), 3.24 – 3.12 (m, 1H), 3.08 – 2.97 (m, 1H), 2.95 – 2.85 (m, 1H).  $^{13}\text{C}$  NMR (101 MHz,  $\text{CDCl}_3$ )  $\delta$  167.94, 164.82, 139.31, 137.78, 136.25, 132.11, 131.28, 129.40, 128.53, 128.29, 127.36, 126.77, 126.14, 122.43, 119.70, 118.23, 111.46, 85.22, 64.47, 47.56, 47.37, 22.66. HRMS (ESI)  $m/z$  calcd for  $\text{C}_{33}\text{H}_{29}\text{BrN}_3\text{O}_3^+$  ( $\text{M}+\text{H}$ ) $^+$  594.1392, found 594.1395.

*1-(2-(1H-indol-3-yl)ethyl)-4-benzyl-6-(3,4-dichlorophenyl)-3-hydroxy-3-phenylpiperazine-2,5-dione*

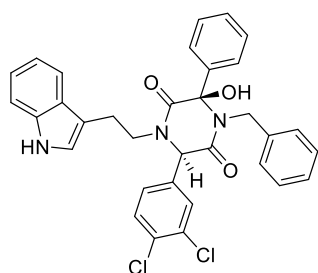

( $\pm$ ) **5e**, red-brown oil, yield 62%, (EA/Hex = 30%,  $R_f = 0.3$ ), purity 94%.  $^1\text{H}$  NMR (400 MHz,  $\text{CDCl}_3$ )  $\delta$  7.60 (s, 1H), 7.53 (d,  $J = 7.3$  Hz, 2H), 7.46 (d,  $J = 7.9$  Hz, 1H), 7.41 – 7.33 (m, 3H), 7.29 (s, 1H), 7.25 (s, 1H), 7.16 (t,  $J = 7.7$  Hz, 3H), 7.08 (t,  $J = 8.4$  Hz, 3H), 7.02 (t,  $J = 7.5$  Hz, 1H), 6.71 (s, 2H), 6.67–6.65 (m, 1H), 5.56 (s, 1H), 4.93 (d,  $J = 14.0$  Hz, 1H), 4.65 (s, 1H), 4.33 (d,  $J = 14.0$  Hz, 1H), 4.24 – 4.15 (m, 1H), 3.25 – 3.13 (m, 1H), 3.08 – 2.97 (m, 1H), 2.94 – 2.83 (m, 1H).  $^{13}\text{C}$  NMR (101 MHz,  $\text{CDCl}_3$ )  $\delta$  168.01, 164.53, 139.18, 137.69, 136.27, 133.24, 132.57, 130.05, 129.46, 128.62, 128.25, 127.44, 126.68, 126.04, 122.49, 119.74, 118.17, 111.52, 111.14, 85.16, 64.07, 47.56, 47.44. HRMS (ESI)  $m/z$  calcd for  $\text{C}_{33}\text{H}_{28}\text{Cl}_2\text{N}_3\text{O}_3^+$  ( $\text{M}+\text{H}$ ) $^+$  584.1508, found 584.1409.

*1-(2-(1H-indol-3-yl)ethyl)-4-benzyl-3-hydroxy-6-(4-nitrophenyl)-3-phenylpiperazine-2,5-dione*

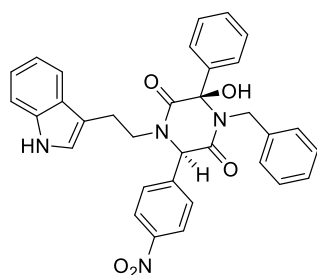

(±) **5f**, red oil, yield 60%, (EA/Hex = 30%,  $R_f$  = 0.3), purity 95%.  $^1\text{H}$  NMR (400 MHz,  $\text{CDCl}_3$ )  $\delta$  7.81 (d,  $J$  = 8.7 Hz, 2H), 7.64 (s, 1H), 7.54 (d,  $J$  = 7.1 Hz, 2H), 7.46 – 7.35 (m, 4H), 7.30 (d,  $J$  = 8.2 Hz, 1H), 7.23 (t,  $J$  = 7.3 Hz, 1H), 7.17 (t,  $J$  = 7.6 Hz, 1H), 7.09 (t,  $J$  = 7.7 Hz, 2H), 7.05 – 6.98 (m, 3H), 6.90 (d,  $J$  = 8.7 Hz, 2H), 6.71 (d,  $J$  = 2.0 Hz, 1H), 5.61 (s, 1H), 4.93 (d,  $J$  = 14.0 Hz, 1H), 4.76 (s, 1H), 4.35 (d,  $J$  = 14.0 Hz, 1H), 4.30 – 4.20 (m, 1H), 3.26 – 3.16 (m, 1H), 3.10 – 3.01 (m, 1H), 2.94 – 2.88 (m, 1H).  $^{13}\text{C}$  NMR (101 MHz,  $\text{CDCl}_3$ )  $\delta$  168.04, 164.19, 147.54, 140.19, 139.27, 137.58, 136.30, 129.46, 128.60, 128.28, 127.51, 126.62, 125.94, 123.11, 122.59, 119.75, 118.09, 111.58, 110.99, 85.11, 64.75, 47.57, 22.72. HRMS (ESI)  $m/z$  calcd for  $\text{C}_{33}\text{H}_{29}\text{N}_4\text{O}_5^+$  ( $\text{M}+\text{H}$ ) $^+$  561.2138, found 561.2095.

*1-(2-(1H-indol-3-yl)ethyl)-4-benzyl-3-hydroxy-6-(4-methoxyphenyl)-3-phenylpiperazine-2,5-dione*

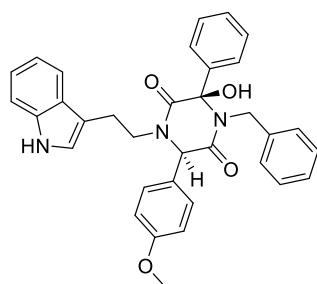

(±) **5g**, brown-yellow oil, yield 82%, (EA/Hex = 30%,  $R_f$  = 0.3), purity 97%.  $^1\text{H}$  NMR (400 MHz,  $\text{CDCl}_3$ )  $\delta$  7.67 (s, 1H), 7.52 (d,  $J$  = 7.2 Hz, 2H), 7.47 (d,  $J$  = 7.9 Hz, 1H), 7.40 – 7.28 (m, 4H), 7.25 (m, 1H), 7.19-7.13 (m, 5H), 7.02 (t,  $J$  = 7.4 Hz, 1H), 6.78 (d,  $J$  = 1.9 Hz, 1H), 6.73 (d,  $J$  = 8.6 Hz, 2H), 6.58 (d,  $J$  = 8.7 Hz, 2H), 5.45 (s, 1H), 4.92 (d,  $J$  = 14.1 Hz, 1H), 4.80 (s, 1H), 4.23 (d,  $J$  = 14.1 Hz, 1H), 4.18 – 4.09 (m, 1H), 3.71 (s, 3H), 3.22 – 3.11 (m, 1H), 3.08 – 2.91 (m, 2H).  $^{13}\text{C}$  NMR (101 MHz,  $\text{CDCl}_3$ )  $\delta$  167.85, 165.53, 159.53, 139.51, 137.95, 136.24, 129.33, 129.01, 128.44, 128.03, 127.25, 126.91, 126.35, 124.99, 122.34, 119.63, 118.35, 113.71, 111.59, 85.35, 64.38,

55.31, 47.60, 47.26, 22.64. HRMS (ESI)  $m/z$  calcd for  $C_{34}H_{32}N_3O_4^+$  (M+H)<sup>+</sup> 546.2393, found 546.2356.

*1-(2-(1H-indol-3-yl)ethyl)-4-benzyl-6-(4-(tert-butyl)phenyl)-3-hydroxy-3-phenylpiperazine-2,5-dione*

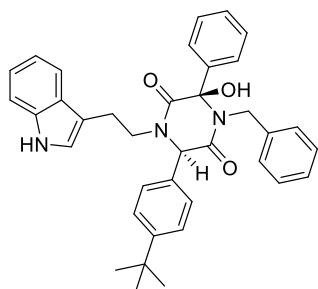

(±) **5h**, brown oil, yield 83%, (EA/Hex = 30%,  $R_f$  = 0.3), purity 96%. <sup>1</sup>H NMR (400 MHz, CDCl<sub>3</sub>) δ 7.71 (s, 1H), 7.53 (d,  $J$  = 7.2 Hz, 2H), 7.45 (d,  $J$  = 7.9 Hz, 1H), 7.36 (t,  $J$  = 7.2 Hz, 2H), 7.31 (d,  $J$  = 7.1 Hz, 1H), 7.24 (d,  $J$  = 3.0 Hz, 1H), 7.22 – 7.17 (m, 1H), 7.14 (d,  $J$  = 7.5 Hz, 1H), 7.12 – 7.07 (m, 4H), 7.04 (d,  $J$  = 8.4 Hz, 2H), 7.00 (t,  $J$  = 7.5 Hz, 1H), 6.77-6.73 (m, 3H), 5.54 (s, 1H), 4.93 (d,  $J$  = 14.1 Hz, 1H), 4.86 (s, 1H), 4.25 (d,  $J$  = 14.1 Hz, 1H), 4.22 – 4.13 (m, 1H), 3.19-3.12 (m, 1H), 3.07 – 2.91 (m, 2H), 1.22 (s, 9H). <sup>13</sup>C NMR (101 MHz, CDCl<sub>3</sub>) δ 167.97, 165.57, 151.14, 139.32, 138.00, 136.25, 129.91, 129.33, 128.87, 128.19, 127.26, 126.90, 126.32, 125.23, 122.43, 119.58, 118.35, 111.50, 85.41, 64.60, 47.59, 34.43, 31.24, 22.68, 14.14. HRMS (ESI)  $m/z$  calcd for  $C_{37}H_{38}N_3O_3^+$  (M+H)<sup>+</sup> 572.2913, found 572.2900.

*1-(2-(1H-indol-3-yl)ethyl)-4-benzyl-3-hydroxy-3-phenyl-6-(p-tolyl)piperazine-2,5-dione*

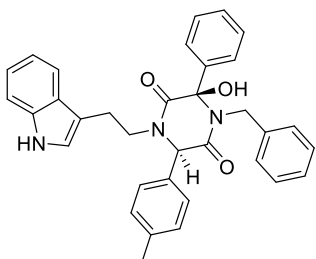

(±) **5i**, brown oil, yield 79%, (EA/Hex = 30%,  $R_f$  = 0.3), purity 95%.  $^1\text{H}$  NMR (400 MHz,  $\text{CDCl}_3$ )  $\delta$  7.67 (s, 1H), 7.52 (d,  $J$  = 7.1 Hz, 2H), 7.46 (d,  $J$  = 7.9 Hz, 1H), 7.38 – 7.27 (m, 4H), 7.24 (d,  $J$  = 2.6 Hz, 1H), 7.17-7.14 (m, 5H), 7.01 (t,  $J$  = 7.5 Hz, 1H), 6.86 (d,  $J$  = 8.0 Hz, 2H), 6.78 (d,  $J$  = 2.0 Hz, 1H), 6.71 (d,  $J$  = 8.0 Hz, 2H), 5.44 (s, 1H), 4.91 (d,  $J$  = 14.1 Hz, 1H), 4.83 (s, 1H), 4.22 (d,  $J$  = 14.1 Hz, 1H), 4.18-4.11 (m, 1H), 3.20 – 3.13 (m, 1H), 3.05 – 2.90 (m, 2H), 2.24 (s, 3H).  $^{13}\text{C}$  NMR (101 MHz,  $\text{CDCl}_3$ )  $\delta$  167.84, 165.36, 139.46, 138.03, 136.22, 130.09, 129.34, 128.93, 127.24, 126.76, 122.33, 119.62, 118.35, 111.58, 85.38, 64.68, 47.63, 22.61, 20.95. HRMS (ESI)  $m/z$  calcd for  $\text{C}_{34}\text{H}_{32}\text{N}_3\text{O}_3^+$  ( $\text{M}+\text{H}$ ) $^+$  530.2444, found 530.2456.

*1-(2-(1H-indol-3-yl)ethyl)-6-(4-bromophenyl)-3-hydroxy-4-(4-methoxybenzyl)-3-phenylpiperazine-2,5-dione*

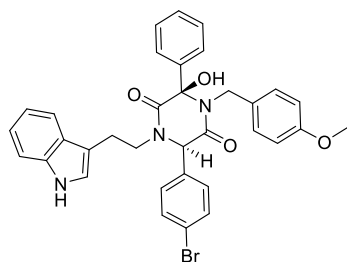

(±) **5j**, brown oil, yield 71%, (EA/Hex = 30%,  $R_f$  = 0.25), purity 97%.  $^1\text{H}$  NMR (400 MHz,  $\text{CDCl}_3$ )  $\delta$  7.84 (s, 1H), 7.48 – 7.42 (m, 3H), 7.28 (s, 1H), 7.23 (s, 1H), 7.13 (dt,  $J$  = 17.2, 6.3 Hz, 7H), 7.00 (t,  $J$  = 7.4 Hz, 1H), 6.86 (d,  $J$  = 8.1 Hz, 2H), 6.72 (s, 1H), 6.67 (d,  $J$  = 8.0 Hz, 2H), 5.62 (s, 1H), 4.84 (d,  $J$  = 14.0 Hz, 1H), 4.79 (s, 1H), 4.21 (d,  $J$  = 14.0 Hz, 1H), 4.12 (ddd,  $J$  = 12.8, 7.9, 4.8 Hz, 1H), 3.79 (s, 3H), 3.16 – 3.07 (m, 1H), 3.04 – 2.96 (m, 1H), 2.89 (dd,  $J$  = 13.3, 7.5 Hz, 1H).  $^{13}\text{C}$  NMR (101 MHz,  $\text{CDCl}_3$ )  $\delta$  167.89, 164.81, 158.89, 139.36, 136.25, 132.29, 131.36, 130.86, 129.86, 129.21, 128.51, 126.83, 126.28, 122.58, 122.19, 119.66, 118.29, 113.55, 111.43, 85.41, 64.39, 55.35, 47.42, 47.20, 22.71. HRMS (ESI)  $m/z$  calcd for  $\text{C}_{34}\text{H}_{31}\text{BrN}_3\text{O}_4^+$  ( $\text{M}+\text{H}$ ) $^+$  624.1493, found 624.1472.

*1-(2-(1H-indol-3-yl)ethyl)-6-(3,4-dichlorophenyl)-3-hydroxy-4-(4-methoxybenzyl)-3-phenylpiperazine-2,5-dione*

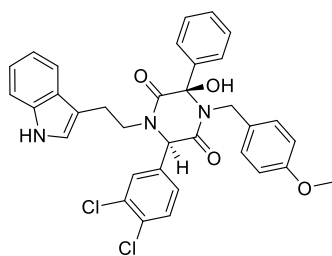

(±) **5k**, brown oil, yield 66%, (EA/Hex = 30%,  $R_f$  = 0.25), purity 95%.  $^1\text{H}$  NMR (400 MHz,  $\text{CDCl}_3$ )  $\delta$  7.75 (s, 1H), 7.46 (dd,  $J$  = 7.8, 5.7 Hz, 3H), 7.28 (d,  $J$  = 4.1 Hz, 1H), 7.24 (s, 1H), 7.20 – 7.14 (m, 3H), 7.09 (t,  $J$  = 7.5 Hz, 3H), 7.02 (t,  $J$  = 7.4 Hz, 1H), 6.89 (d,  $J$  = 8.6 Hz, 2H), 6.75 – 6.71 (m, 2H), 6.68 (dd,  $J$  = 8.4, 1.8 Hz, 1H), 5.59 (s, 1H), 4.87 (d,  $J$  = 13.9 Hz, 1H), 4.70 (s, 1H), 4.26 (d,  $J$  = 13.9 Hz, 1H), 4.20 – 4.12 (m, 1H), 3.81 (s, 3H), 3.19 – 3.10 (m, 1H), 3.05 – 2.97 (m, 1H), 2.89 (dd,  $J$  = 13.4, 7.7 Hz, 1H).  $^{13}\text{C}$  NMR (101 MHz,  $\text{CDCl}_3$ )  $\delta$  167.97, 164.46, 158.95, 139.20, 136.24, 133.33, 132.51, 130.92, 130.08, 129.77, 129.48, 128.59, 126.72, 126.08, 122.42, 119.72, 118.23, 113.55, 111.52, 111.23, 85.23, 64.01, 55.36, 47.47, 47.13, 22.70. HRMS (ESI)  $m/z$  calcd for  $\text{C}_{34}\text{H}_{30}\text{Cl}_2\text{N}_3\text{O}_4^+$  ( $\text{M}+\text{H}$ ) $^+$  614.1608, found 614.1529.

*1-(2-(1H-indol-3-yl)ethyl)-6-(4-fluorophenyl)-3-hydroxy-4-(4-methoxybenzyl)-3-phenylpiperazine-2,5-dione*

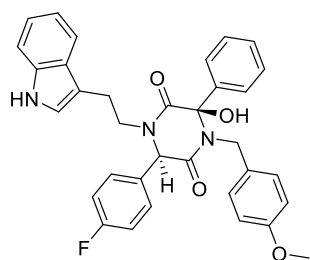

(±) **5l**, brown oil, yield 70%, (EA/Hex = 30%,  $R_f$  = 0.25), purity 93%.  $^1\text{H}$  NMR (400 MHz,  $\text{CDCl}_3$ )  $\delta$  7.82 (s, 1H), 7.46 (dd,  $J$  = 7.8, 4.8 Hz, 3H), 7.27 – 7.23 (m, 2H), 7.18 – 7.10 (m, 5H), 7.01 (t,  $J$  = 7.5 Hz, 1H), 6.87 (d,  $J$  = 8.6 Hz, 2H), 6.80 – 6.70 (m, 5H), 5.60 (s, 1H), 4.85 (d,  $J$  = 16.1 Hz, 2H), 4.21 (d,  $J$  = 14.0 Hz, 1H), 4.13 (ddd,  $J$  = 13.1, 8.3, 4.6 Hz, 1H), 3.80 (s, 3H), 3.18 – 3.08 (m, 1H), 3.05 – 2.97 (m, 1H), 2.91 (dd,  $J$  = 13.2, 7.7 Hz, 1H).  $^{13}\text{C}$  NMR (101 MHz,  $\text{CDCl}_3$ )  $\delta$  167.89, 165.15, 158.88, 139.41, 136.24, 130.85, 129.91, 129.17, 128.51, 126.85, 126.30, 122.35, 119.64, 118.30,

115.30, 115.09, 113.54, 111.45, 85.38, 64.24, 55.34, 47.28, 47.14, 46.93, 22.70.  
HRMS (ESI)  $m/z$  calcd for  $C_{34}H_{31}FN_3O_4^+$  (M+H)<sup>+</sup> 614.1529, found 614.1522.

*1-(2-(1H-indol-3-yl)ethyl)-3-hydroxy-4-(4-methoxybenzyl)-6-(4-nitrophenyl)-3-phenylpiperazine-2,5-dione*

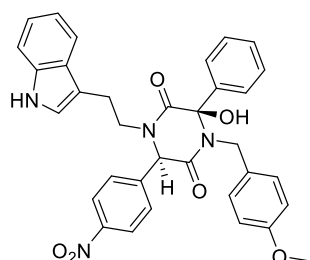

(±) **5m**, brown oil, yield 64%, (EA/Hex = 30%,  $R_f$  = 0.25), purity 91%. <sup>1</sup>H NMR (400 MHz, CDCl<sub>3</sub>) δ 7.82 (d,  $J$  = 8.8 Hz, 2H), 7.71 (s, 1H), 7.46 (dd,  $J$  = 14.1, 8.2 Hz, 3H), 7.30 (d,  $J$  = 8.2 Hz, 1H), 7.22 (d,  $J$  = 7.3 Hz, 1H), 7.17 (dd,  $J$  = 11.2, 4.0 Hz, 1H), 7.09 (t,  $J$  = 7.8 Hz, 2H), 7.05 – 6.98 (m, 3H), 6.91 (dd,  $J$  = 8.8, 2.2 Hz, 4H), 6.71 (d,  $J$  = 2.2 Hz, 1H), 5.58 (s, 1H), 4.87 (d,  $J$  = 13.9 Hz, 1H), 4.80 (s, 1H), 4.29 (d,  $J$  = 13.9 Hz, 1H), 4.26 – 4.17 (m, 1H), 3.83 (s, 3H), 3.18 (dt,  $J$  = 15.5, 7.9 Hz, 1H), 3.09 – 2.99 (m, 1H), 2.94 – 2.85 (m, 1H). <sup>13</sup>C NMR (101 MHz, CDCl<sub>3</sub>) δ 168.05, 164.10, 159.02, 147.54, 140.25, 139.30, 136.27, 130.96, 129.66, 129.37, 128.59, 127.40, 126.65, 125.99, 123.12, 122.48, 119.75, 118.13, 113.56, 111.56, 111.10, 85.12, 64.72, 55.36, 47.62, 47.07, 29.71, 22.72. HRMS (ESI)  $m/z$  calcd for  $C_{34}H_{31}N_4O_6^+$  (M+H)<sup>+</sup> 591.2293, found 591.2290.

*1-(2-(1H-indol-3-yl)ethyl)-3-hydroxy-4-(4-methoxybenzyl)-3,6-diphenylpiperazine-2,5-dione*

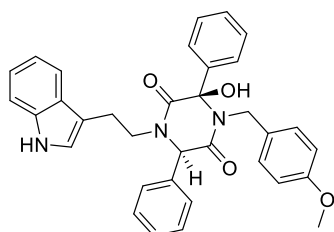

(±) **5n**, brown oil, yield 73%, (EA/Hex = 30%,  $R_f$  = 0.3), purity 92%.  $^1\text{H}$  NMR (400 MHz,  $\text{CDCl}_3$ )  $\delta$  7.75 (s, 1H), 7.48 (t,  $J$  = 7.0 Hz, 3H), 7.29 (d,  $J$  = 8.1 Hz, 1H), 7.25 – 7.21 (m, 1H), 7.18 – 7.11 (m, 6H), 7.07–7.00 (m, 3H), 6.90–6.84 (m, 4H), 6.78 (d,  $J$  = 1.3 Hz, 1H), 5.49 (s, 1H), 4.92 – 4.83 (m, 2H), 4.22 – 4.12 (m, 2H), 3.82 (s, 3H), 3.20 – 3.10 (m, 1H), 3.07 – 2.99 (m, 1H), 2.97 – 2.88 (m, 1H).  $^{13}\text{C}$  NMR (101 MHz,  $\text{CDCl}_3$ )  $\delta$  167.91, 165.20, 158.84, 139.37, 136.20, 133.06, 130.89, 130.01, 129.02, 128.40, 128.26, 126.76, 126.34, 122.30, 119.62, 118.36, 113.48, 111.57, 111.38, 85.35, 64.78, 55.34, 47.44, 47.16, 22.64. HRMS (ESI)  $m/z$  calcd for  $\text{C}_{34}\text{H}_{32}\text{N}_3\text{O}_4^+$  ( $\text{M}+\text{H}$ ) $^+$  546.2393, found 546.2388.

*1-(2-(1H-indol-3-yl)ethyl)-3-(4-bromophenyl)-3-hydroxy-4-(4-methoxybenzyl)-6-phenylpiperazine-2,5-dione*

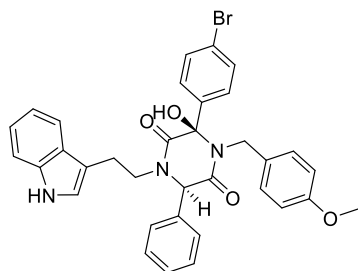

(±) **5o**, brown oil, yield 78% (EA/Hex = 30%,  $R_f$  = 0.25), purity 94%.  $^1\text{H}$  NMR (400 MHz,  $\text{CDCl}_3$ )  $\delta$  7.92 (s, 1H), 7.45 – 7.40 (m, 3H), 7.21 (d,  $J$  = 5.9 Hz, 4H), 7.11 (d,  $J$  = 7.9 Hz, 3H), 6.98 (t,  $J$  = 8.2 Hz, 3H), 6.85 (dd,  $J$  = 15.6, 8.1 Hz, 4H), 6.72 (s, 1H), 5.63 (s, 1H), 4.93 (s, 1H), 4.80 (d,  $J$  = 14.0 Hz, 1H), 4.16 (dd,  $J$  = 15.5, 8.5 Hz, 2H), 3.77 (s, 3H), 3.09 (dd,  $J$  = 14.1, 7.0 Hz, 1H), 3.01 – 2.90 (m, 2H).  $^{13}\text{C}$  NMR (101 MHz,  $\text{CDCl}_3$ )  $\delta$  167.52, 165.16, 158.90, 138.47, 136.26, 133.09, 131.44, 130.81, 129.78, 128.72, 128.18, 126.92, 126.68, 123.44, 122.33, 119.62, 118.34, 113.58, 111.46, 85.25, 64.67, 55.35, 47.61, 47.02, 22.73. HRMS (ESI)  $m/z$  calcd for  $\text{C}_{34}\text{H}_{31}\text{BrN}_3\text{O}_4^+$  ( $\text{M}+\text{H}$ ) $^+$  624.1487, found 624.1493.

*1-(2-(1H-indol-3-yl)ethyl)-3-(furan-2-yl)-3-hydroxy-4-(4-methoxybenzyl)-6-phenylpiperazine-2,5-dione*

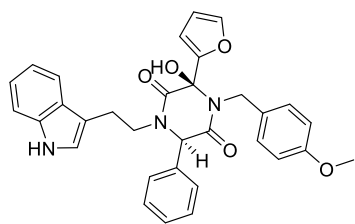

(±) **5p**, brown oil, yield 70%, (EA/Hex = 30%,  $R_f$  = 0.25), purity 95%. <sup>1</sup>H NMR (400 MHz, CDCl<sub>3</sub>) δ 7.89 (s, 1H), 7.45 (d,  $J$  = 7.9 Hz, 1H), 7.39 (d,  $J$  = 8.5 Hz, 2H), 7.25 – 7.17 (m, 5H), 7.13 (t,  $J$  = 7.6 Hz, 1H), 7.07 – 6.98 (m, 3H), 6.83 (d,  $J$  = 8.5 Hz, 2H), 6.77 (d,  $J$  = 1.5 Hz, 1H), 6.20 – 6.10 (m, 2H), 5.49 (s, 1H), 4.87 (s, 1H), 4.70 (d,  $J$  = 14.2 Hz, 1H), 4.34 (d,  $J$  = 14.1 Hz, 1H), 4.15 (t,  $J$  = 8.9 Hz, 1H), 3.78 (s, 3H), 3.11 (dd,  $J$  = 19.4, 9.8 Hz, 1H), 3.04 – 2.95 (m, 2H). <sup>13</sup>C NMR (101 MHz, CDCl<sub>3</sub>) δ 165.76, 164.96, 158.79, 151.35, 143.08, 136.26, 134.04, 130.69, 129.83, 128.42, 126.98, 122.28, 119.57, 118.41, 113.50, 111.50, 110.92, 109.93, 81.34, 65.00, 55.31, 47.42, 46.64, 22.68. HRMS (ESI)  $m/z$  calcd for C<sub>32</sub>H<sub>30</sub>N<sub>3</sub>O<sub>5</sub><sup>+</sup>(M+H)<sup>+</sup> 536.2177, found 536.2180



## NMR Characterization Figures of Products

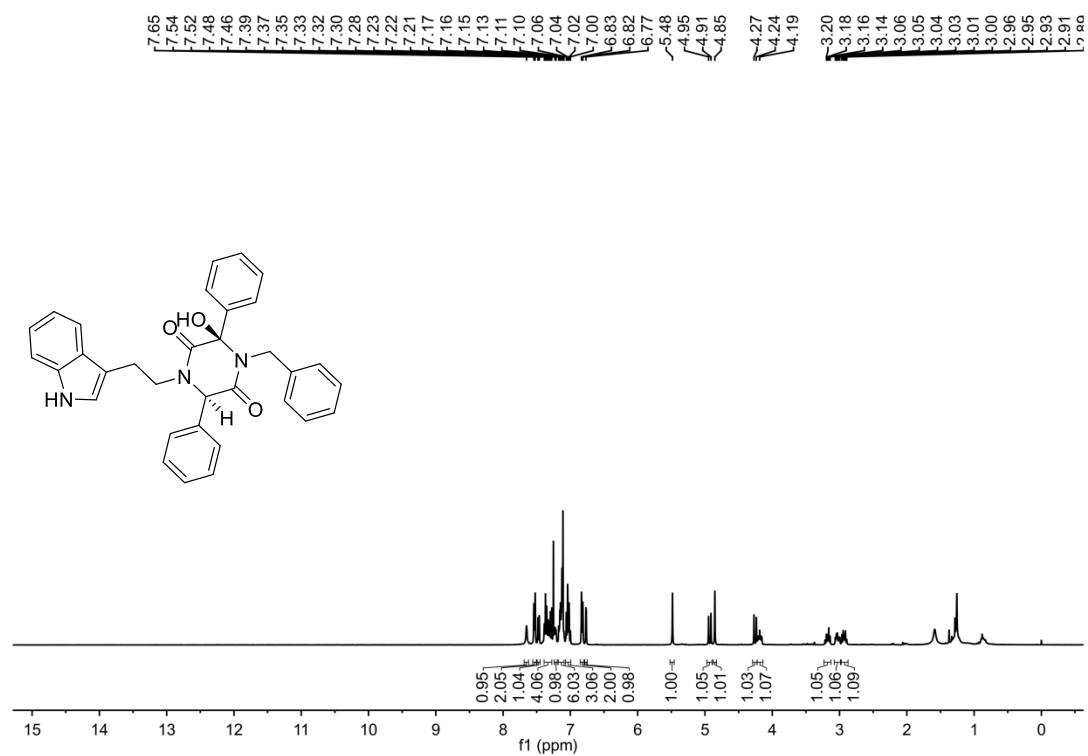

<sup>1</sup>H NMR spectrum of (±) 5a

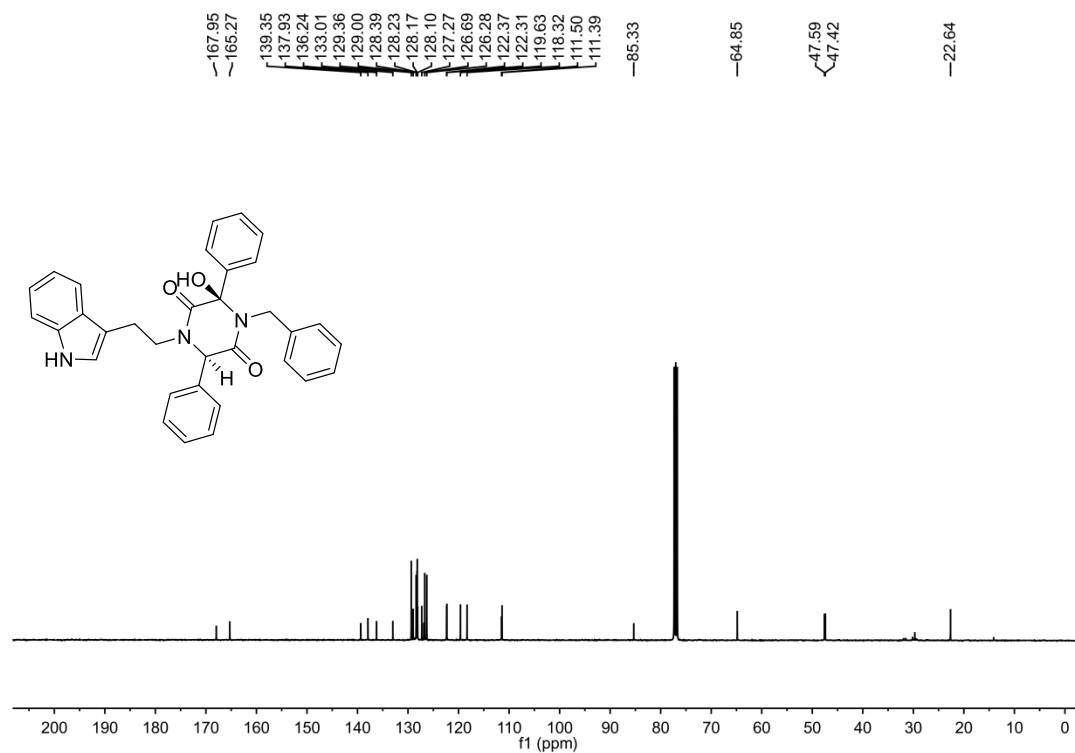

<sup>13</sup>C NMR spectrum of (±) 5a

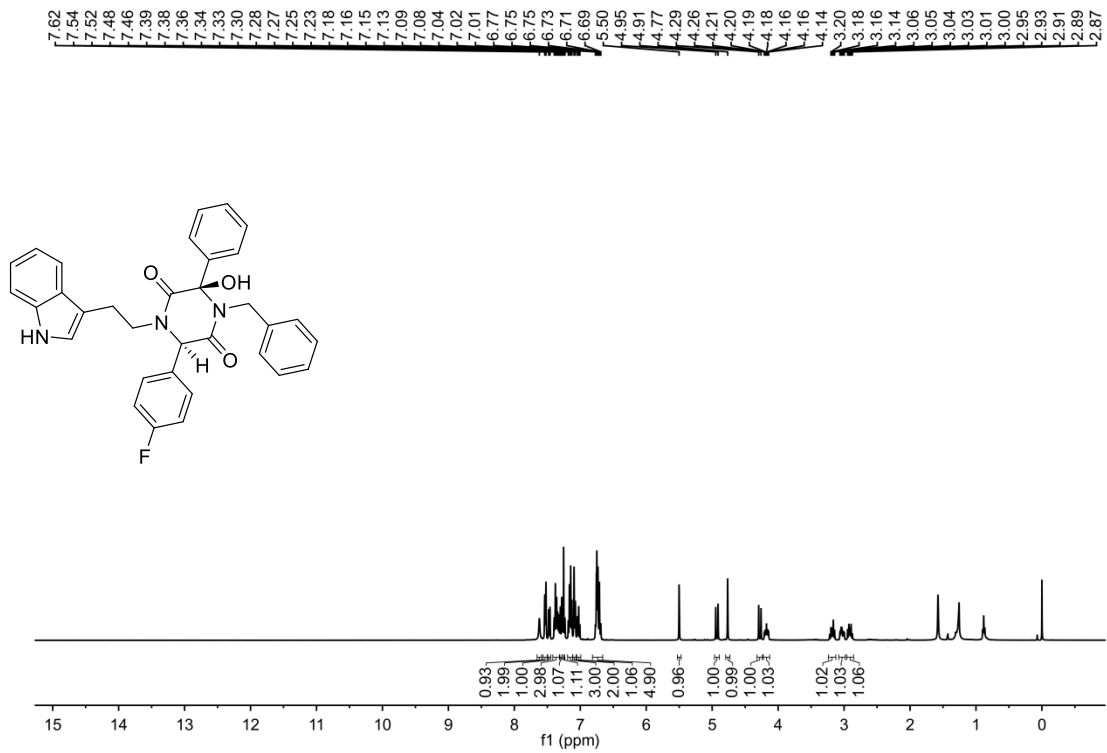

<sup>1</sup>H NMR spectrum of (±) **5b**

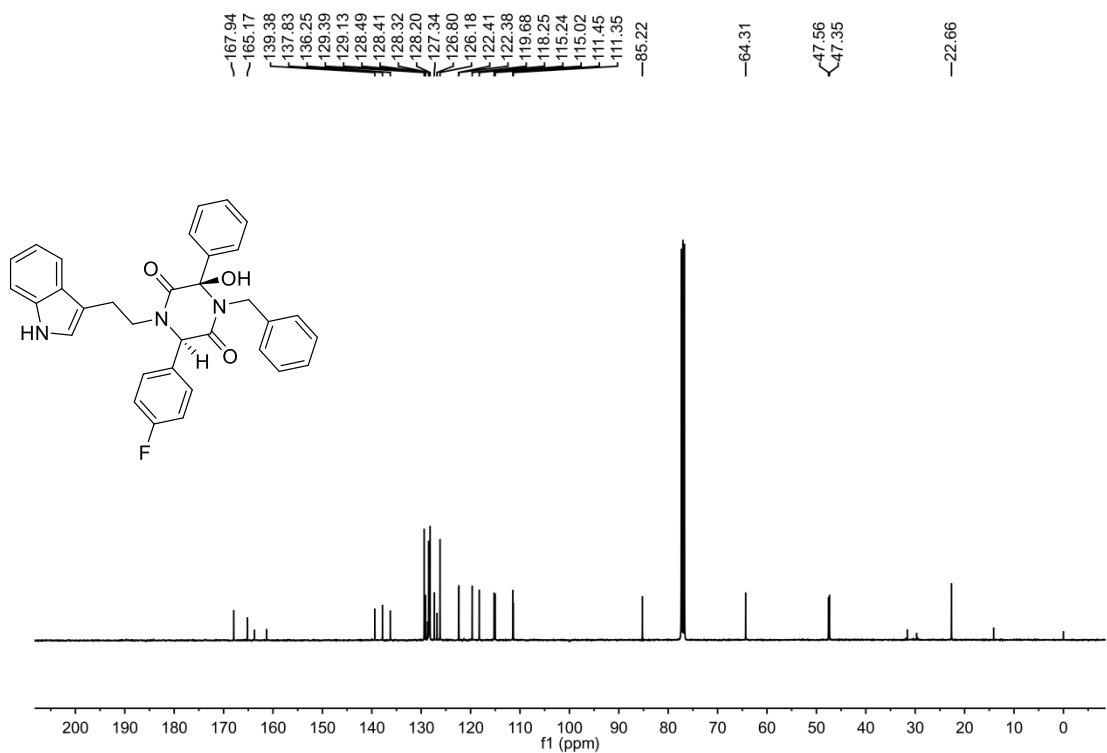

<sup>13</sup>C NMR spectrum of (±) **5b**

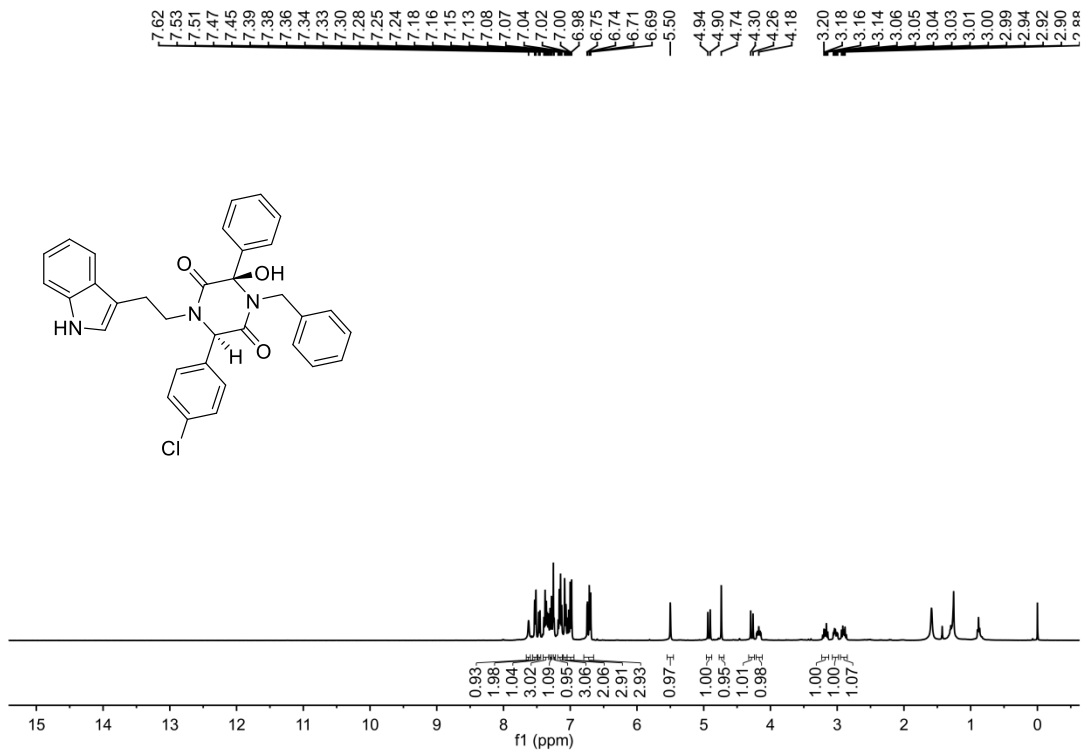

<sup>1</sup>H NMR spectrum of ( $\pm$ ) **5c**

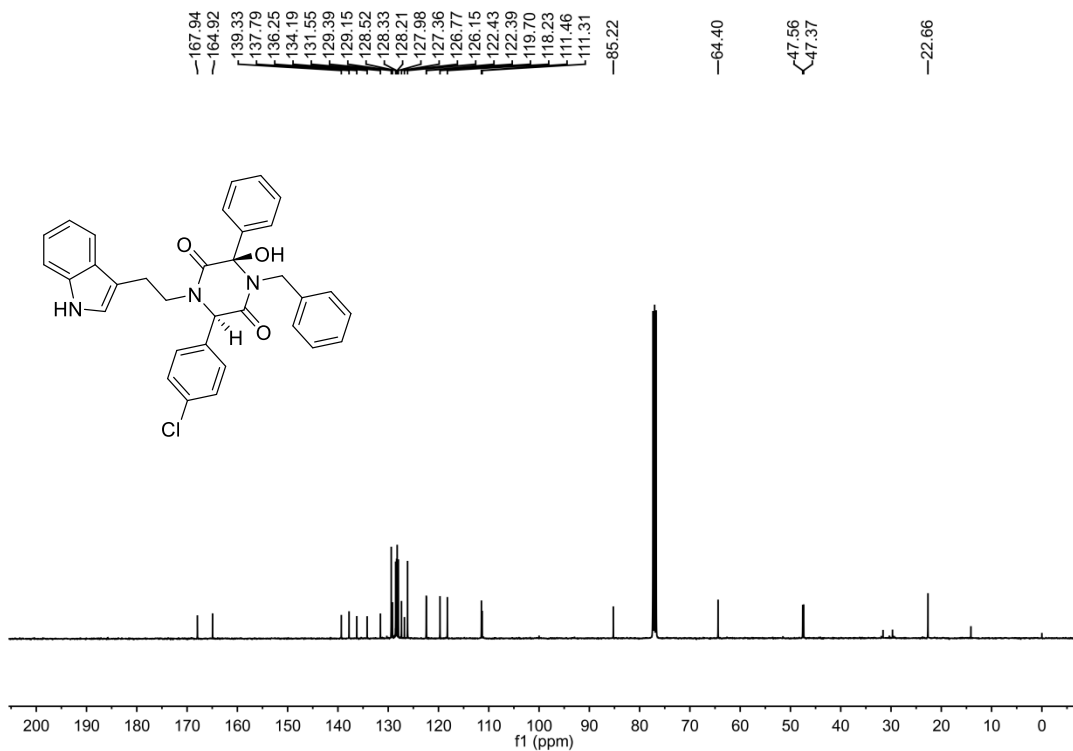

<sup>13</sup>C NMR spectrum of ( $\pm$ ) **5c**

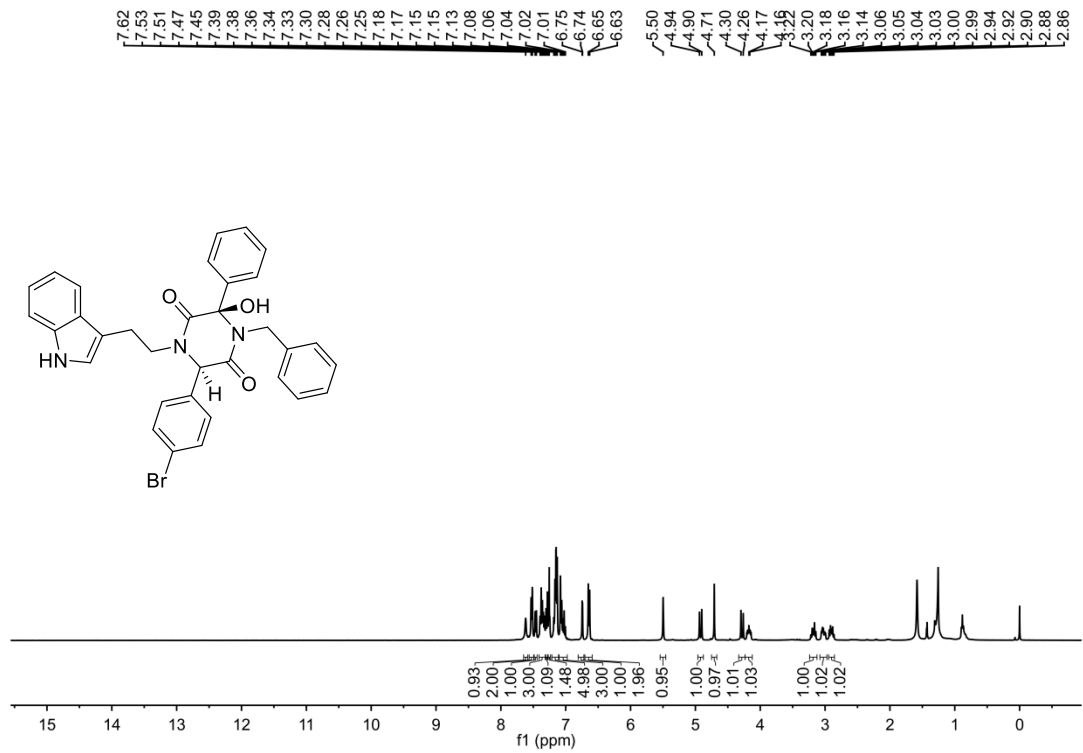

$^1\text{H}$  NMR spectrum of ( $\pm$ ) **5d**

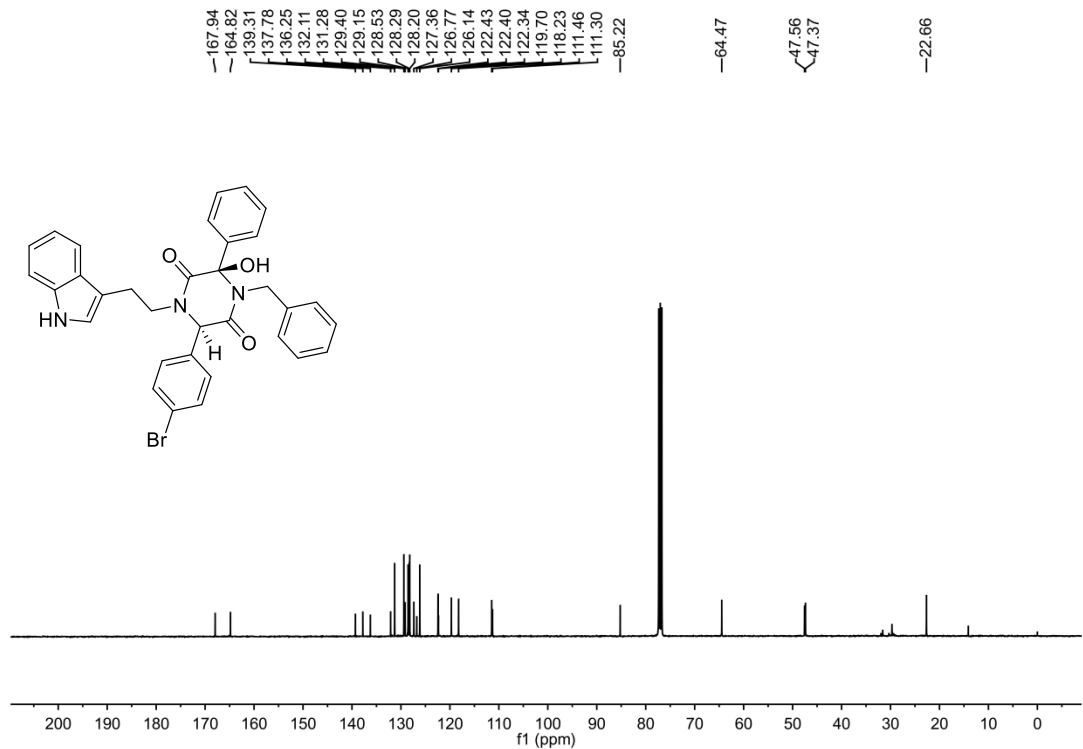

$^{13}\text{C}$  NMR spectrum of ( $\pm$ ) **5d**

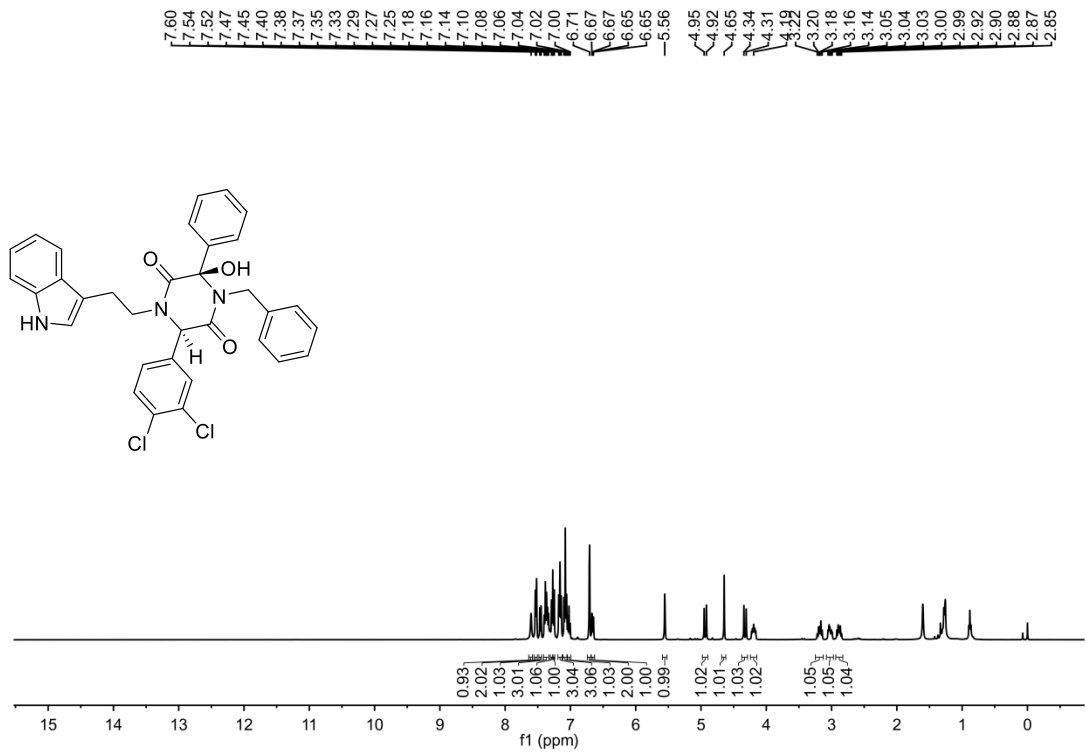

<sup>1</sup>H NMR spectrum of ( $\pm$ ) **5e**

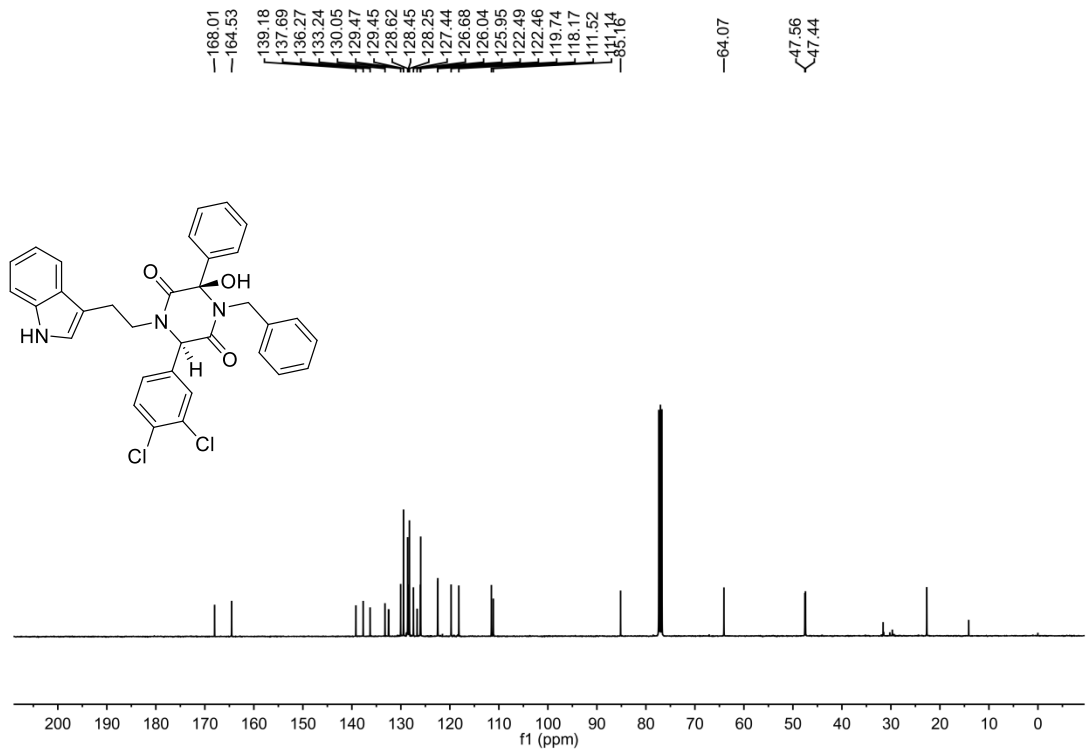

<sup>13</sup>C NMR spectrum of ( $\pm$ ) **5e**

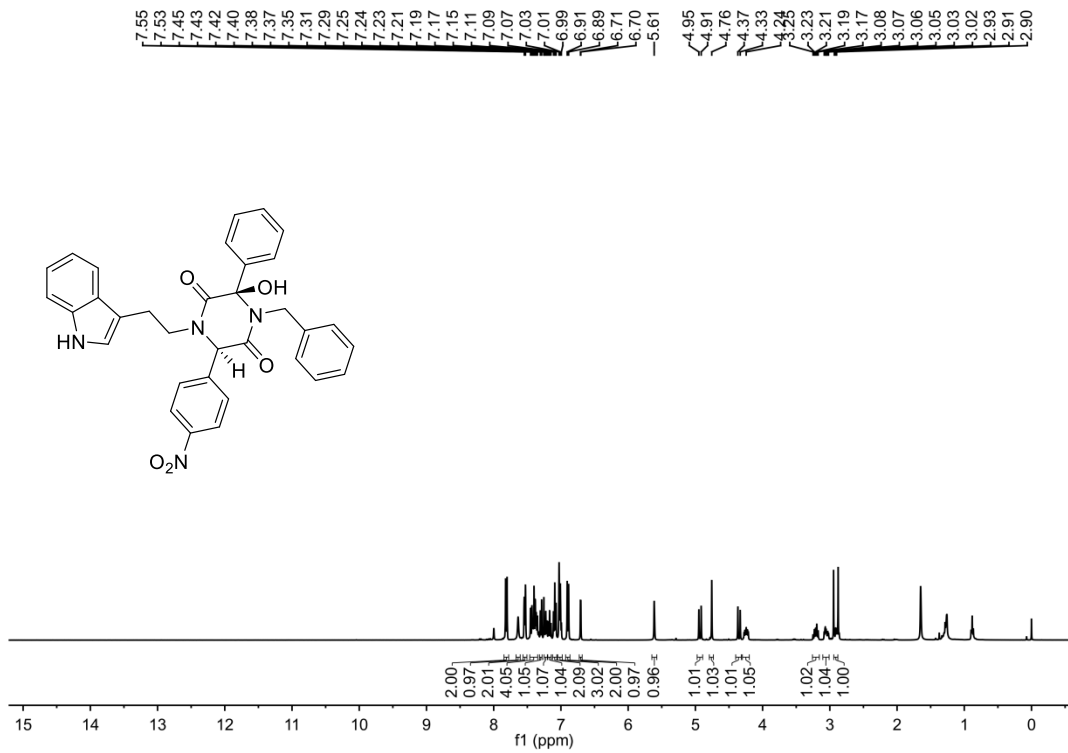

<sup>1</sup>H NMR spectrum of ( $\pm$ ) **5f**

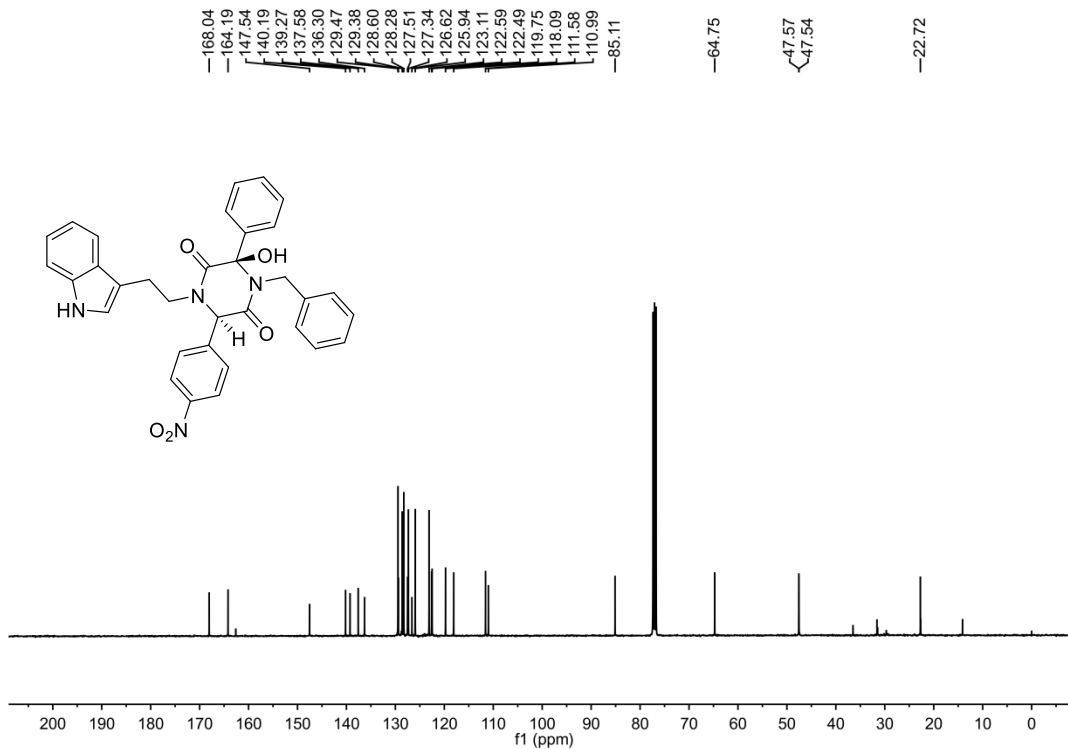

<sup>13</sup>C NMR spectrum of ( $\pm$ ) **5f**

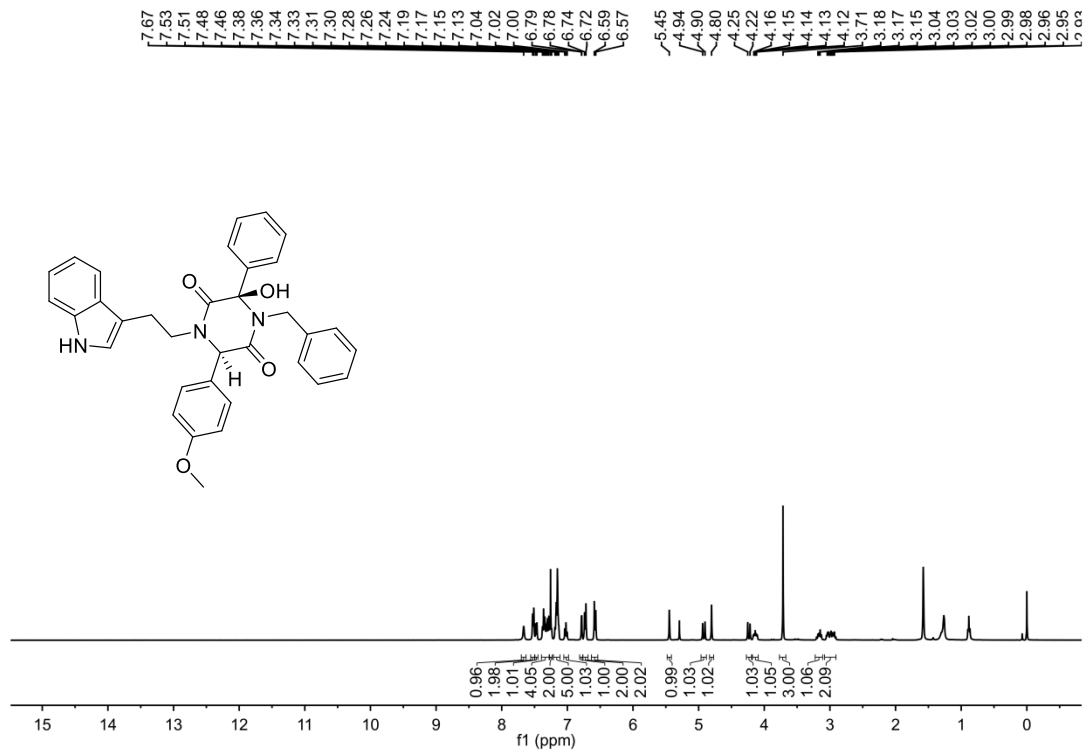

**<sup>1</sup>H NMR spectrum of (±) 5g**

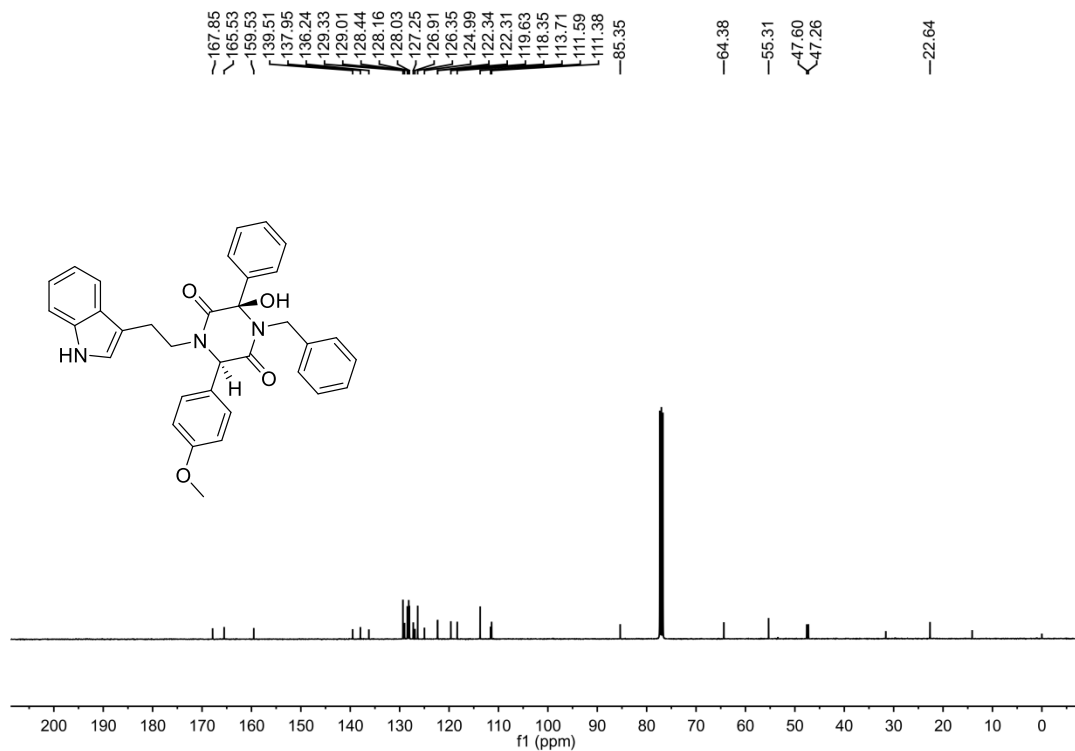

**<sup>13</sup>C NMR spectrum of (±) 5g**

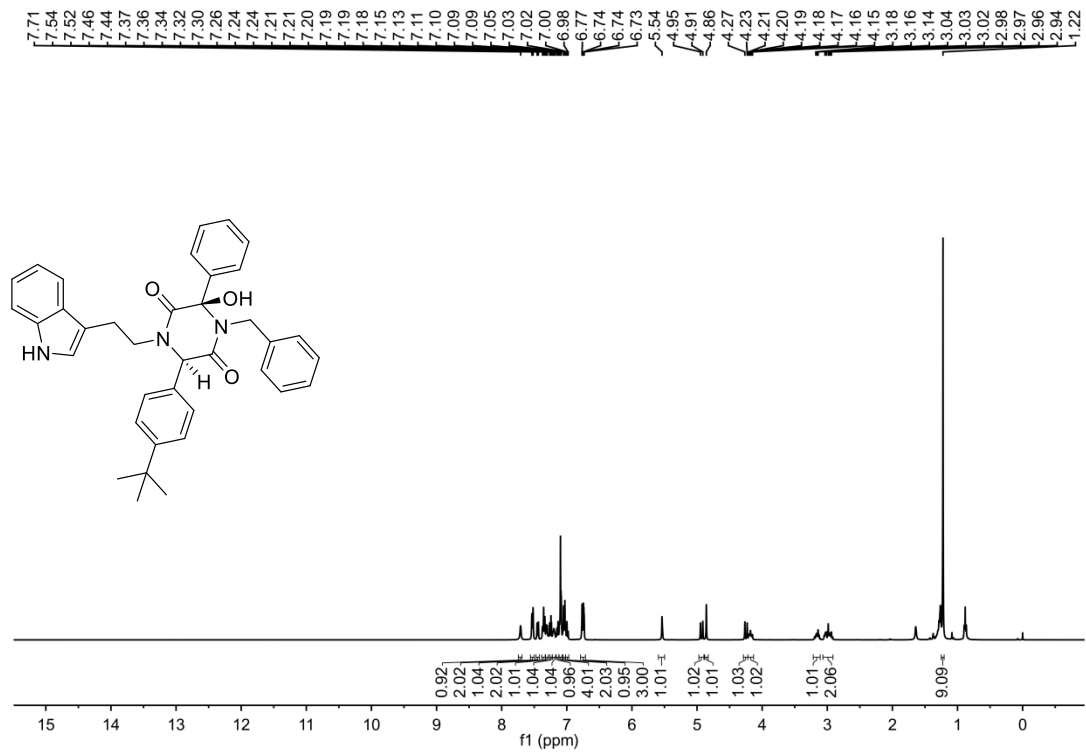

$^1\text{H}$  NMR spectrum of ( $\pm$ ) **5h**

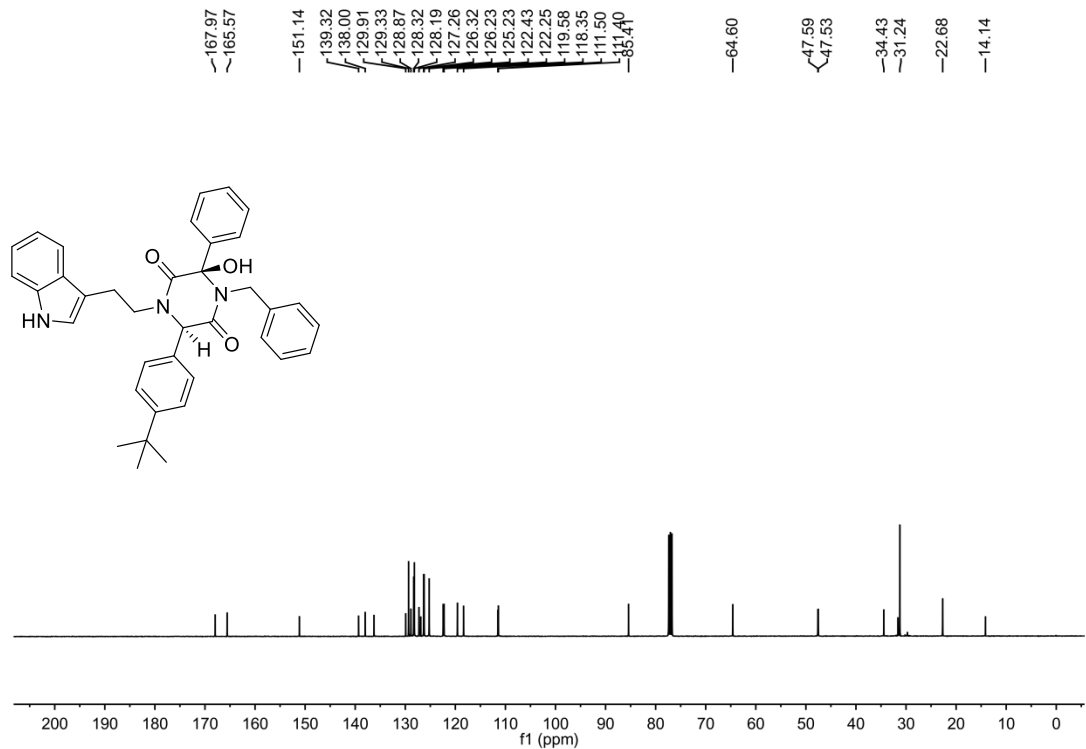

$^{13}\text{C}$  NMR spectrum of ( $\pm$ ) **5h**



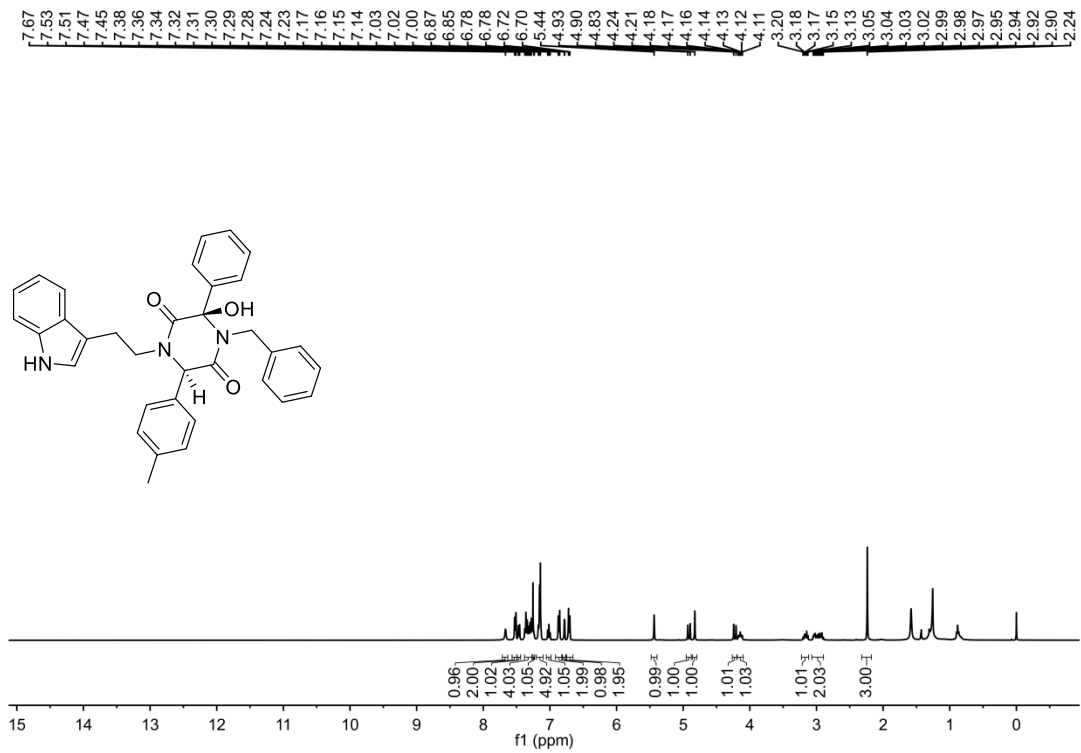

**<sup>1</sup>H NMR spectrum of (±) 5i**

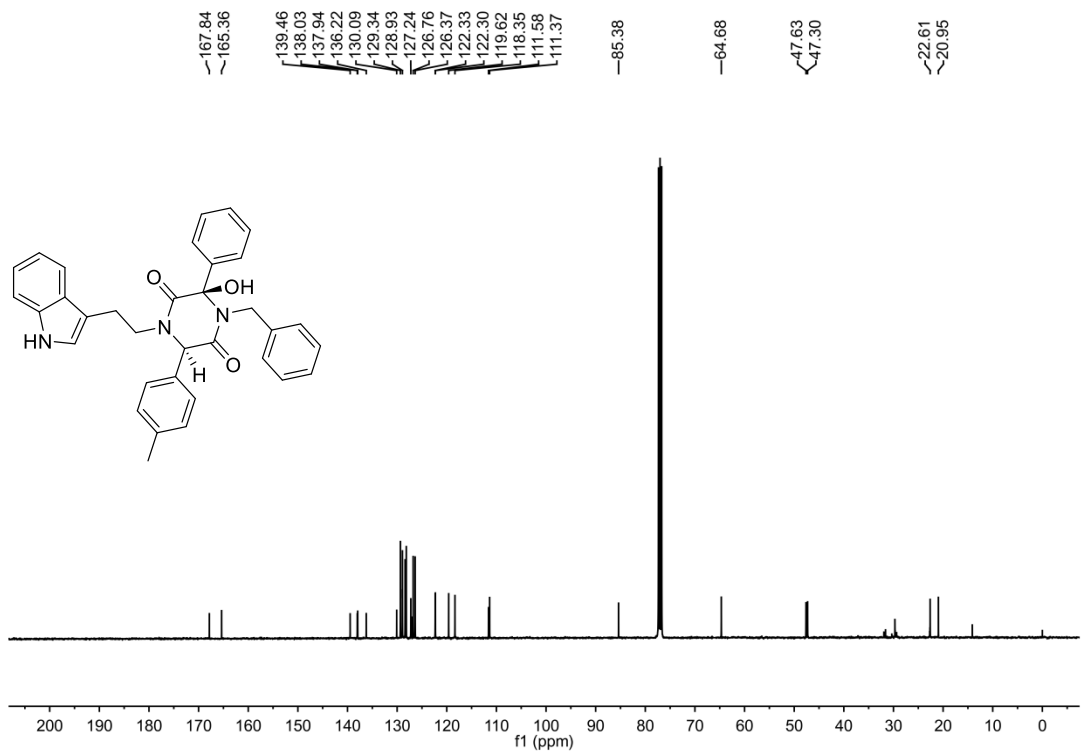

**<sup>13</sup>C NMR spectrum of (±) 5i**

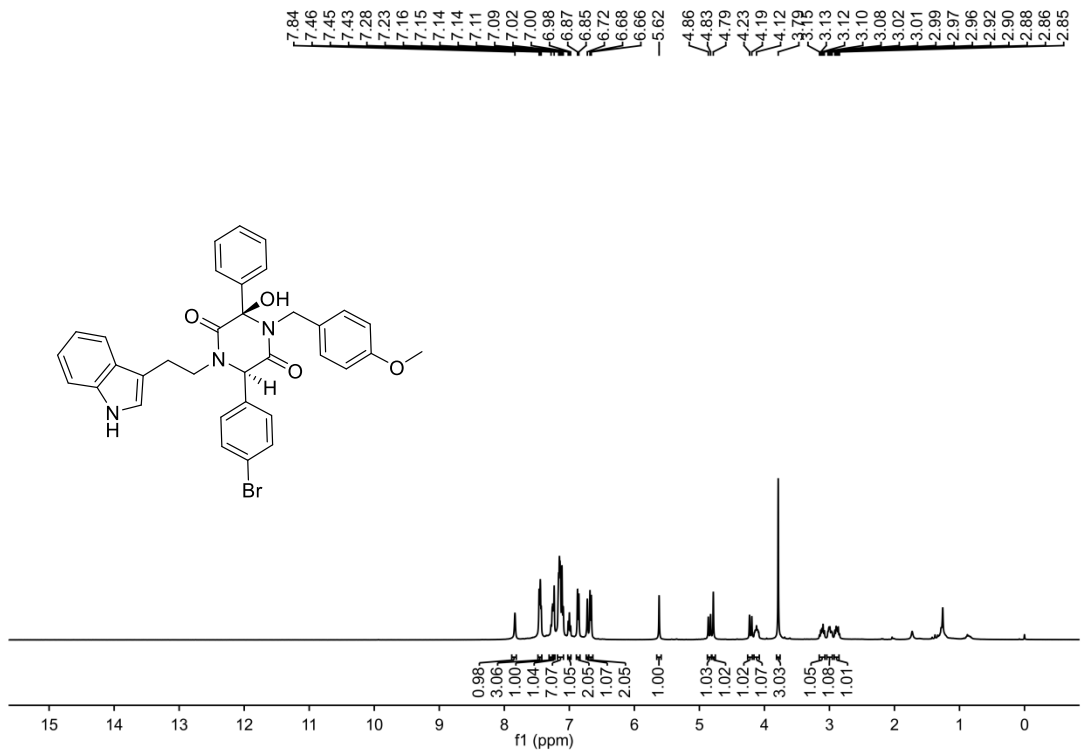

**<sup>1</sup>H NMR spectrum of (±) 5j**

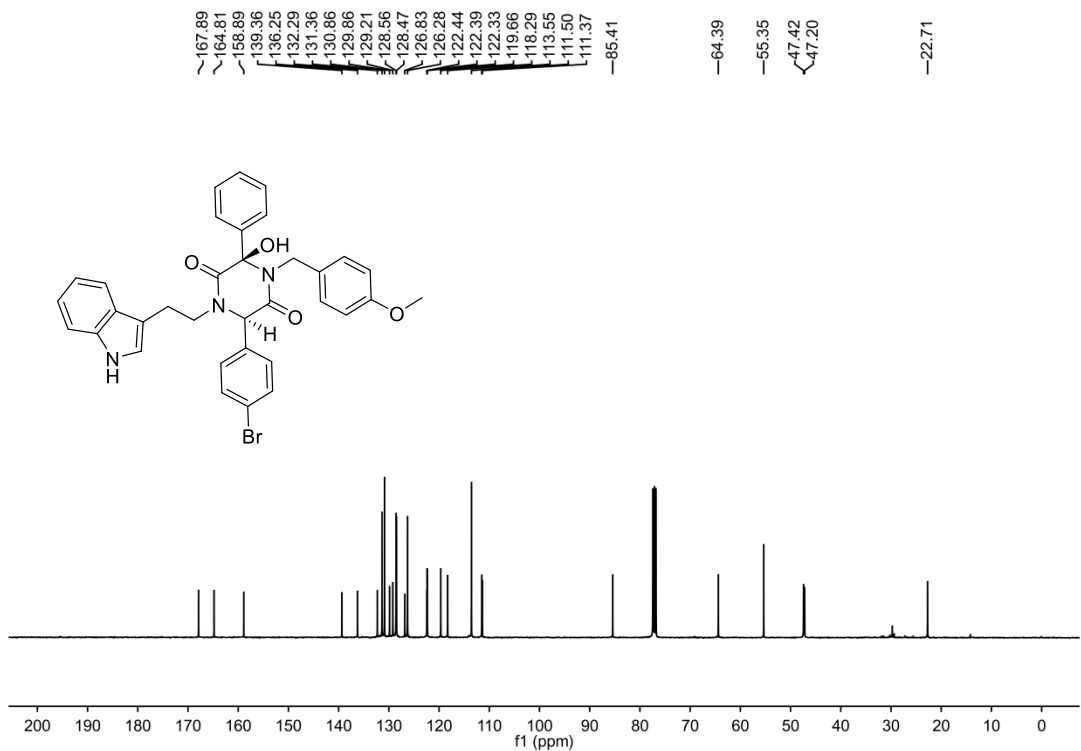

**<sup>13</sup>C NMR spectrum of (±) 5j**

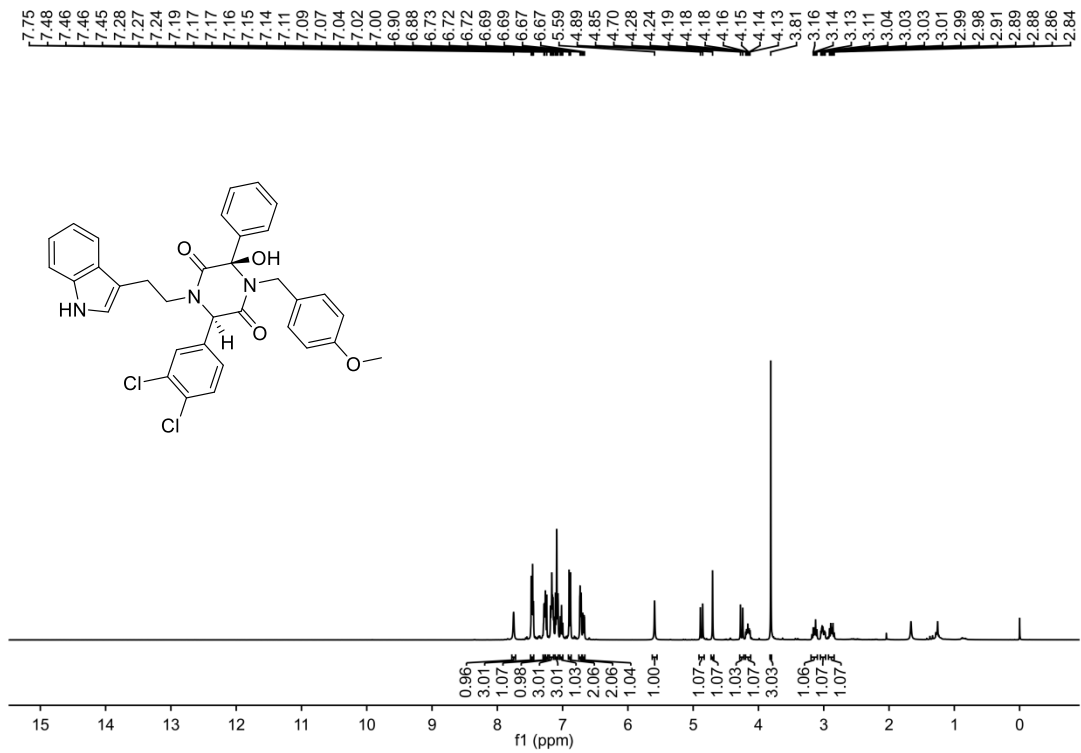

<sup>1</sup>H NMR spectrum of (±) 5k

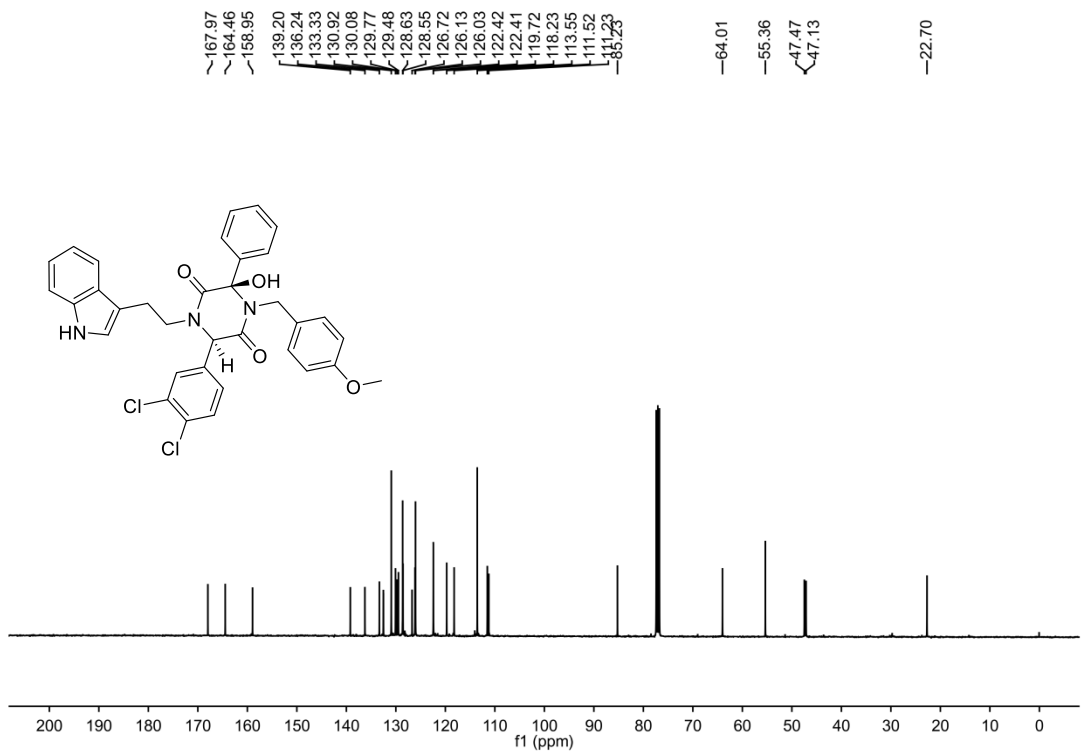

<sup>13</sup>C NMR spectrum of (±) 5k

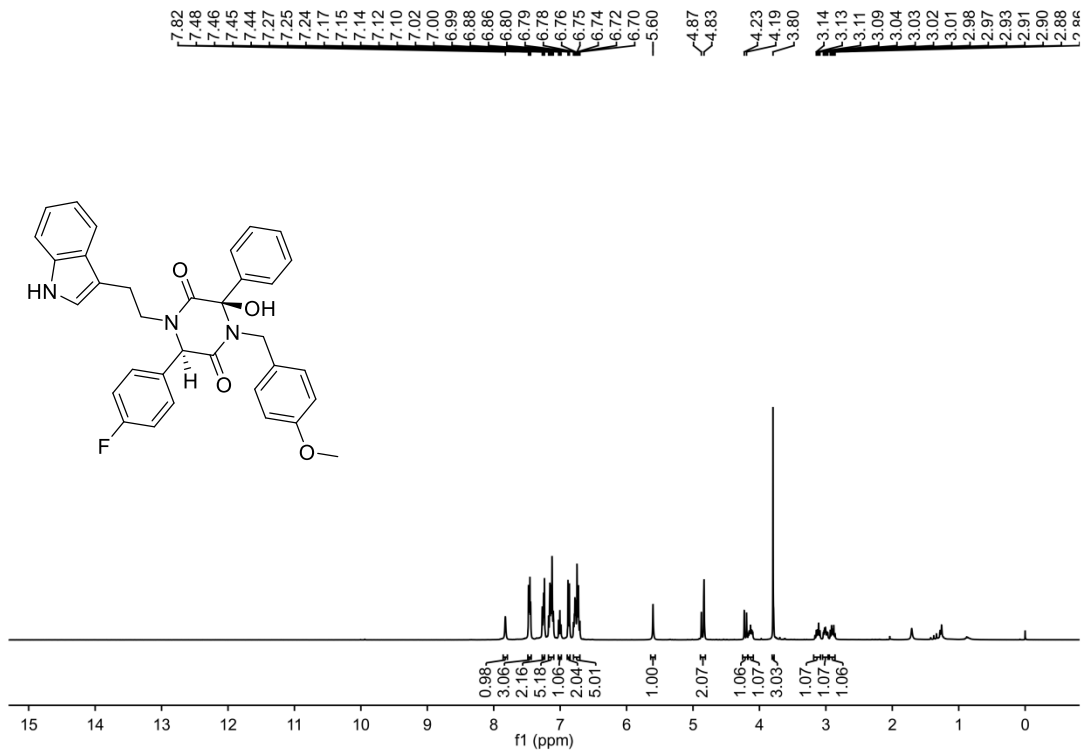

$^1\text{H}$  NMR spectrum of ( $\pm$ ) **51**

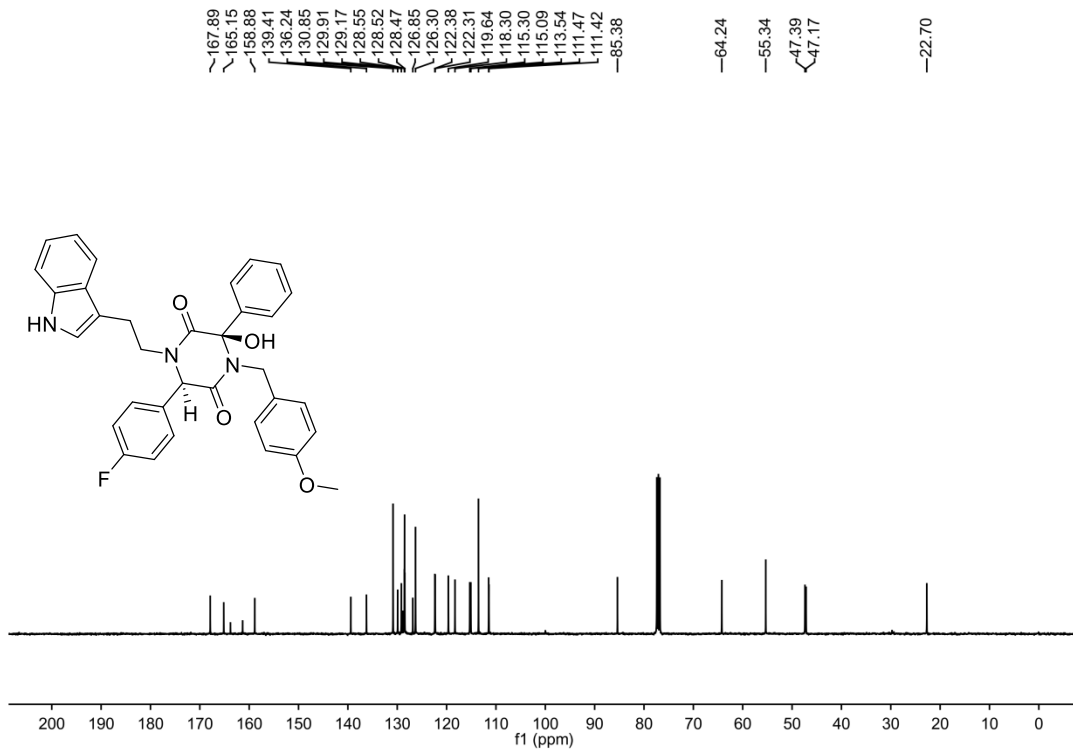

$^{13}\text{C}$  NMR spectrum of ( $\pm$ ) **51**

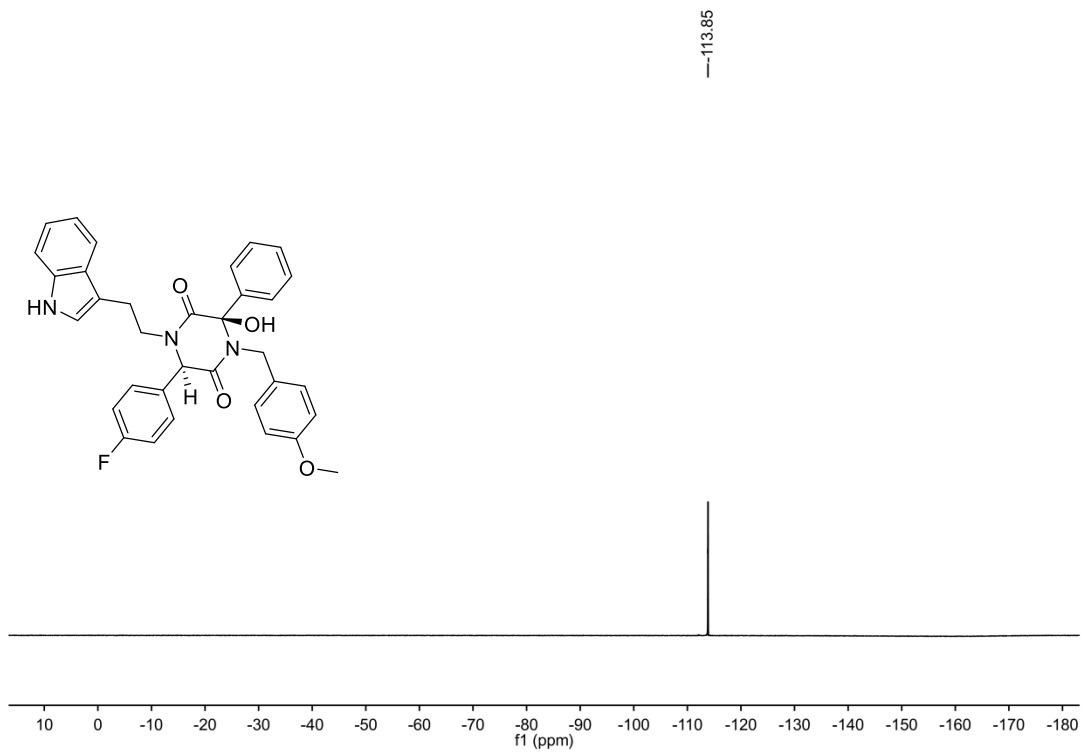

$^{19}\text{F}$  NMR spectrum of ( $\pm$ ) **51**

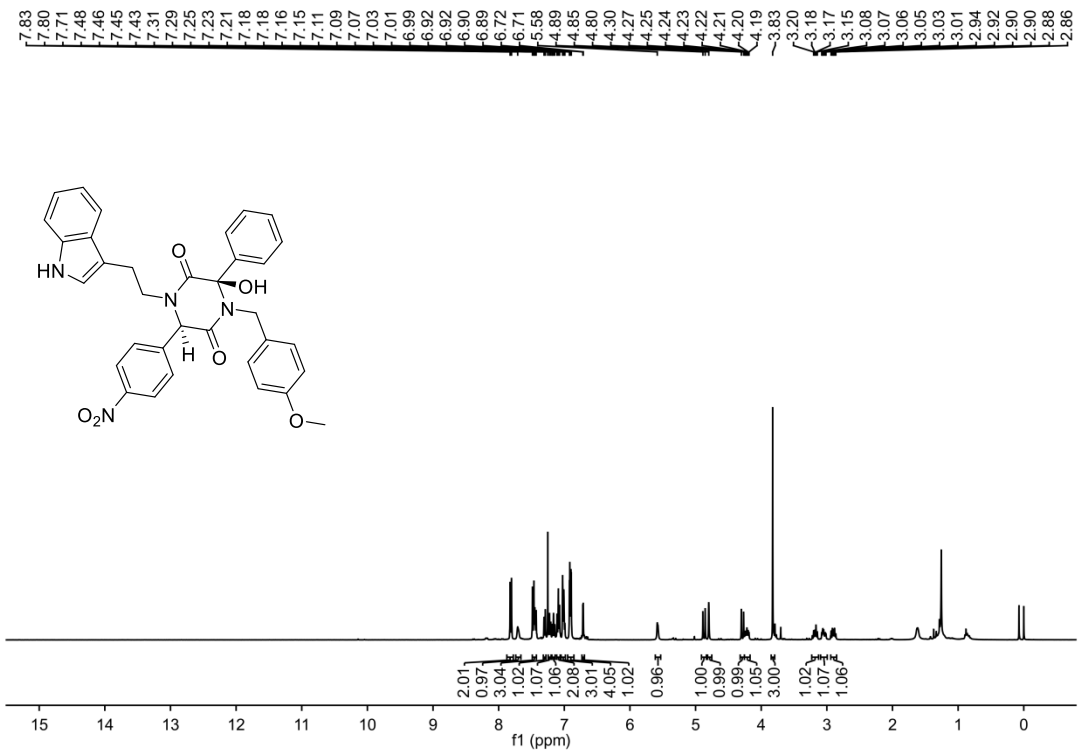

<sup>1</sup>H NMR spectrum of (±) 5m

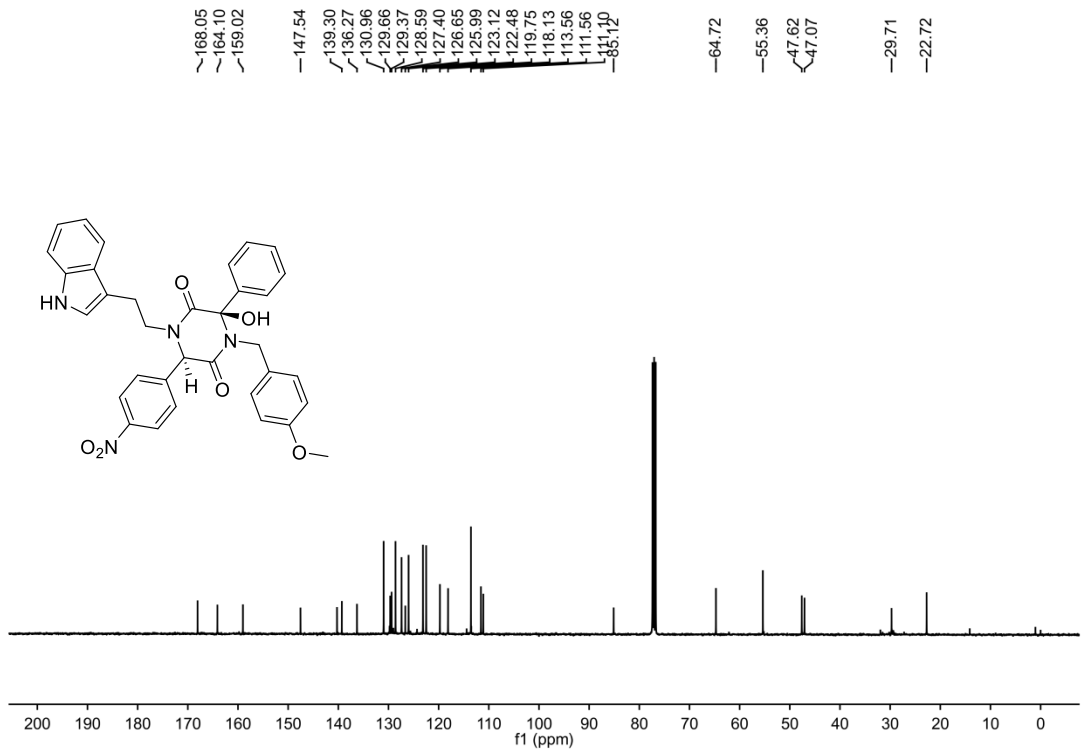

<sup>13</sup>C NMR spectrum of (±) 5m

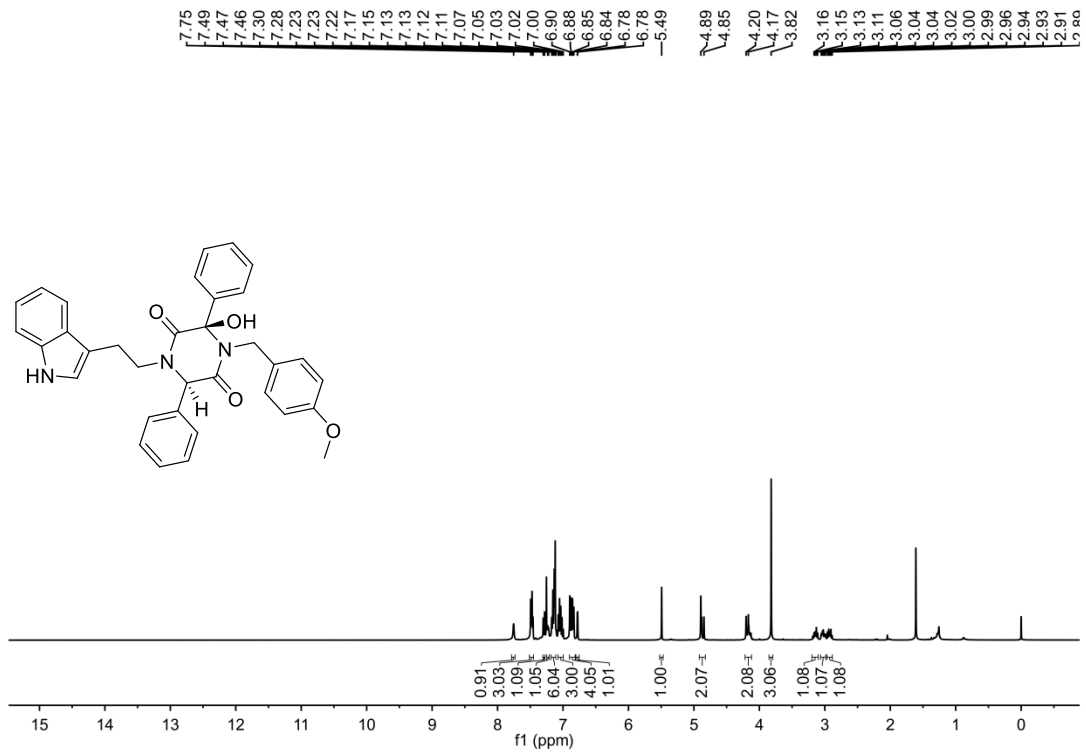

$^1\text{H}$  NMR spectrum of ( $\pm$ ) **5n**

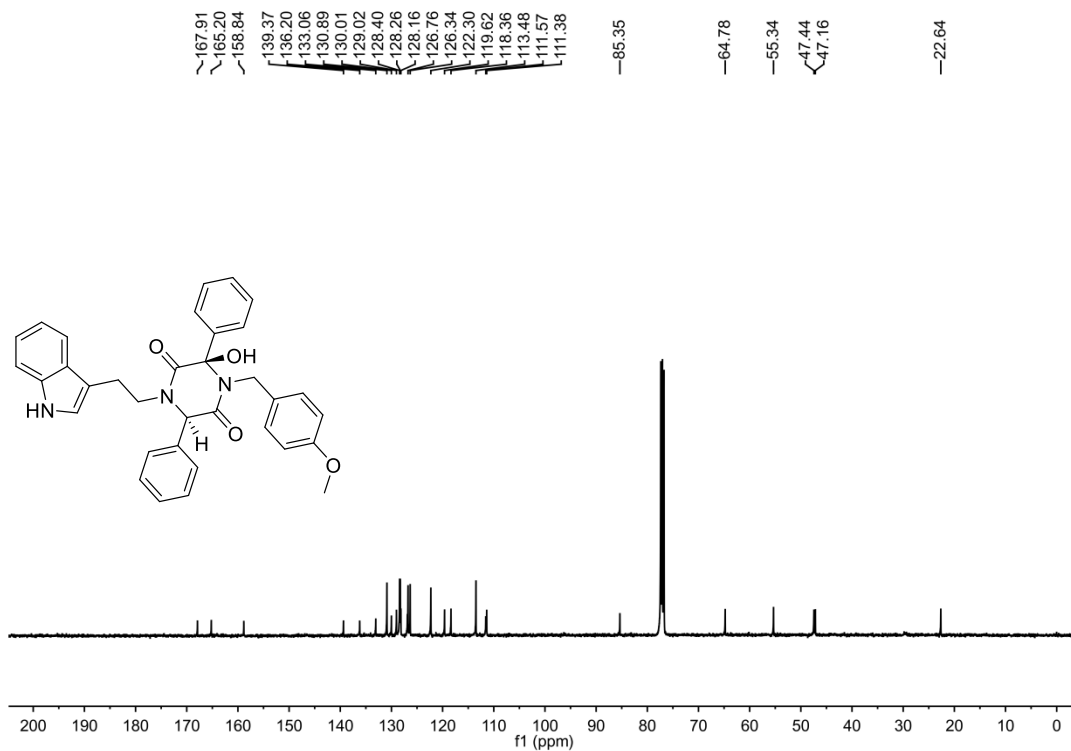

$^{13}\text{C}$  NMR spectrum of ( $\pm$ ) **5n**

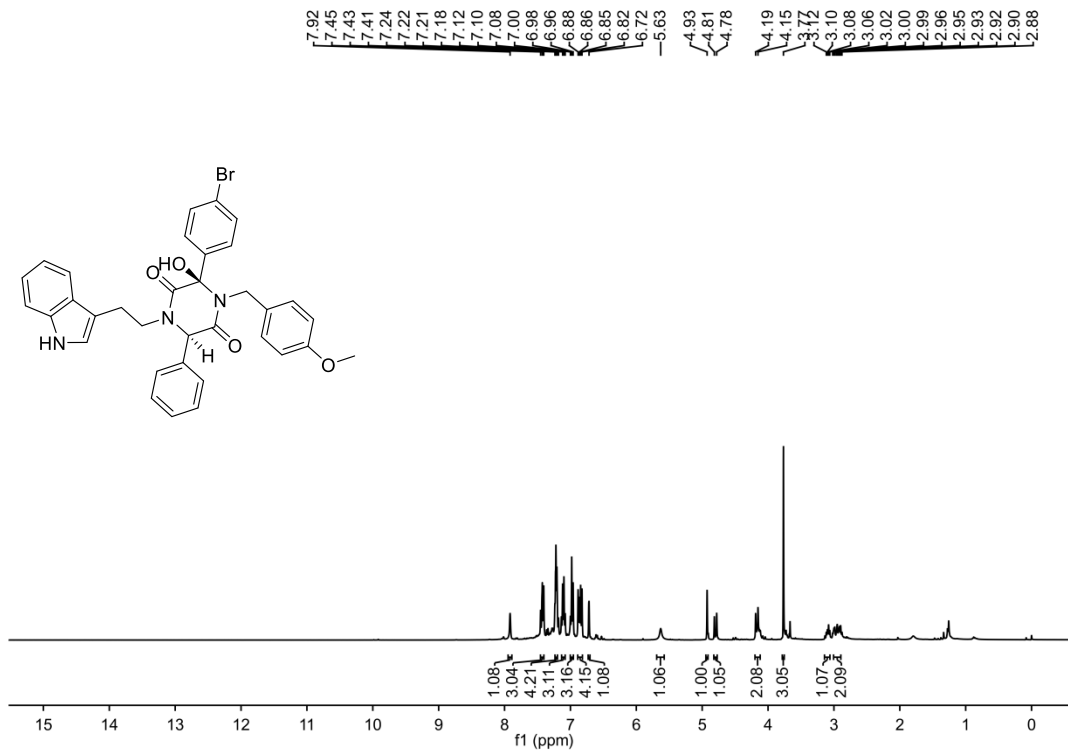

<sup>1</sup>H NMR spectrum of (±) 50

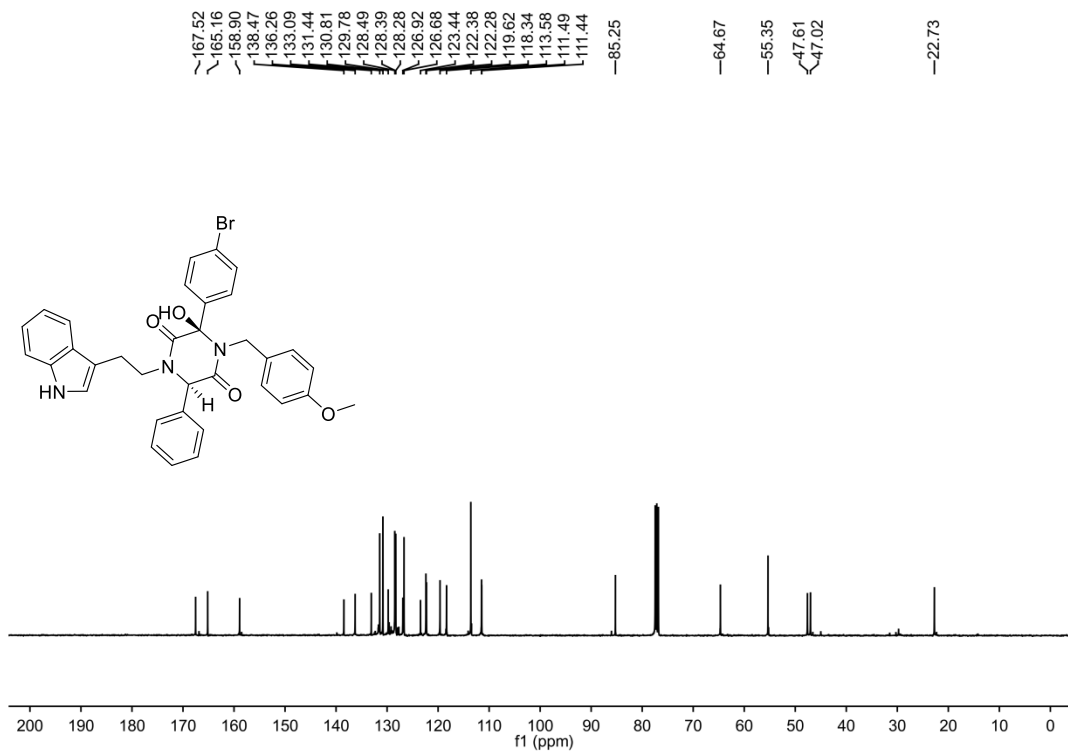

<sup>13</sup>C NMR spectrum of (±) 50



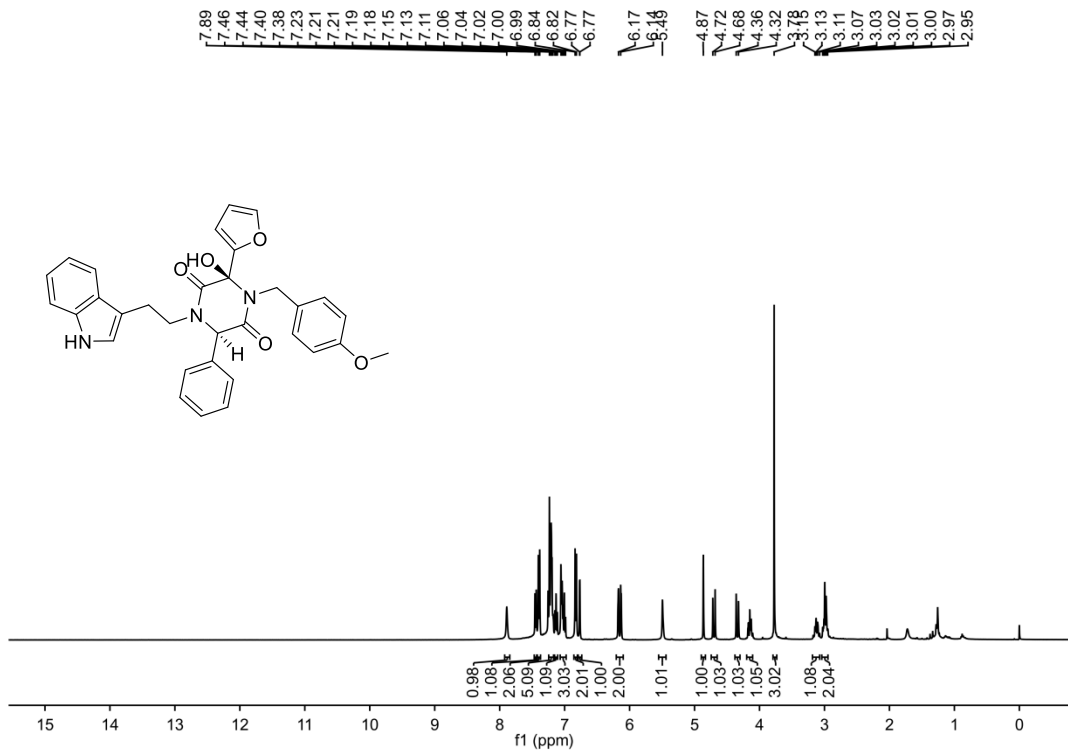

<sup>1</sup>H NMR spectrum of ( $\pm$ ) **5p**

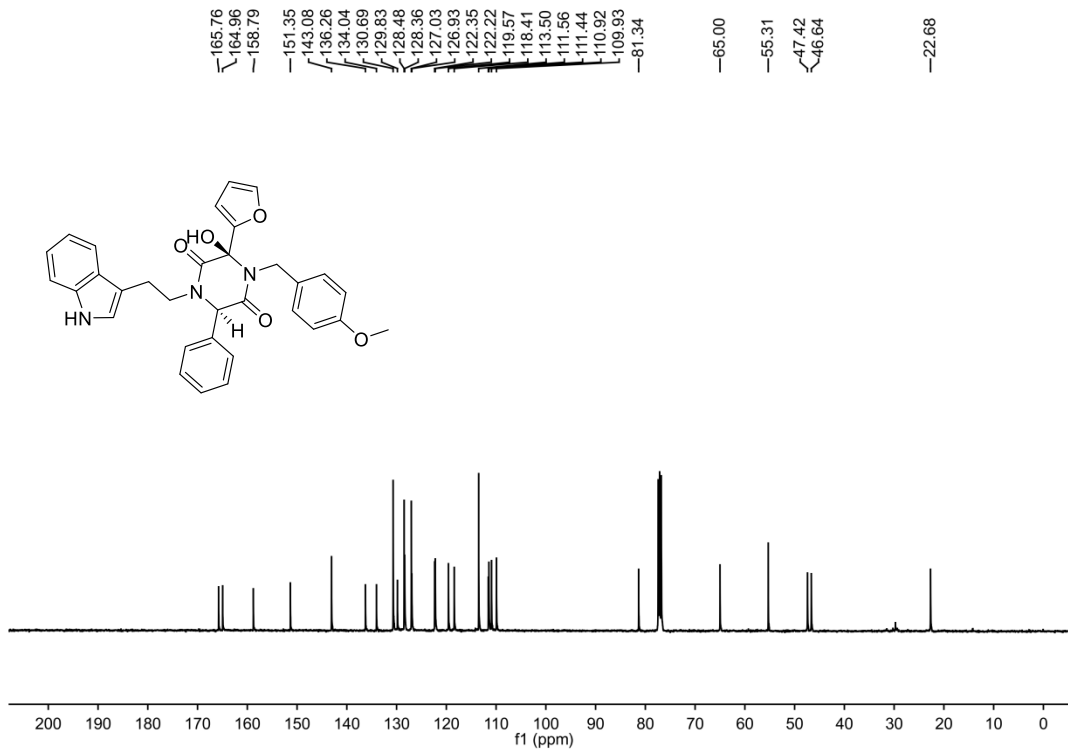

<sup>13</sup>C NMR spectrum of ( $\pm$ ) **5p**
